# Supplementary material for: Metal free access to quinolines via C–C bond cleavage of styrenes
Source: Royal Society of Chemistry journal article supplement (doi:10.1039/c5qo00010f), 2015-01-01
Supplement: c5qo00010f1.pdf [file c5qo00010f1.pdf]

## Supporting Information

### Metal Free Access to Quinolines *via* C-C Bond Cleavage of Styrenes

*Ramesh Deshidi, Shekaraiah Devari and Bhahwal Ali Shah\**

#### General Experimental:

All chemicals were obtained from Sigma-Aldrich Company and used as received.  $^1\text{H}$  and  $^{13}\text{C}$  NMR spectras were recorded on Bruker-Avance DPX FT-NMR 500 and 400 MHz instruments. Chemical data for protons are reported in parts per million (ppm) downfield from tetramethylsilane and are referenced to the residual proton in the NMR solvent ( $\text{CDCl}_3$ , 7.26 ppm). Carbon nuclear magnetic resonance spectra ( $^{13}\text{C}$  NMR) were recorded at 125 MHz or 100 MHz: chemical data for carbons are reported in parts per million (ppm,  $\delta$  scale) downfield from tetramethylsilane and are referenced to the carbon resonance of the solvent. ESI-MS and HRMS spectra were recorded on Agilent 1100 LC-Q-TOF and HRMS-6540-UHD machines.

#### Experimental procedures:

**General procedure for synthesis of 2,4-disubstituted quinolines;** Iodine (1 mmol) was added to a solution of styrene **1** (1 mmol) in DMSO (2 ml) followed by the addition *p*-methyl aniline **2** (0.5 mmol). The reaction mixture was then heated at 80 °C for 18 h and the product formation was monitored by TLC. After completion, reaction mixture was extracted with ethyl acetate (3 x 50ml). The combined organic layers were washed with brine solution, concentrated on rotary evaporator and purified by chromatography on a basic alumina column using ethyl acetate and hexane (2:98) to afford **3a** in 81% yields.

### Spectroscopic Data:

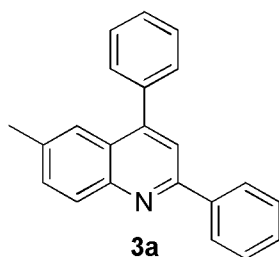

**6-methyl-2,4-diphenylquinoline (3a).**  $^1\text{H}$  NMR (400 MHz,  $\text{CDCl}_3$ )  $\delta$  8.21 – 8.11 (m, 3H), 7.77 (s, 1H), 7.65 (s, 1H), 7.57 – 7.43 (m, 9H), 2.47 (s, 3H);  $^{13}\text{C}$  NMR (100 MHz,  $\text{CDCl}_3$ )  $\delta$  156.1, 148.5, 147.4, 139.8, 138.6, 136.3, 131.8, 129.8, 129.5, 129.1, 128.8, 128.6, 128.3, 127.5, 125.7, 124.4, 119.4, 21.8; HRMS (TOF)  $m/z$   $[\text{M} + \text{H}]^+$  Calcd for  $\text{C}_{22}\text{H}_{18}\text{N}$  296.1434 found 296.1424.

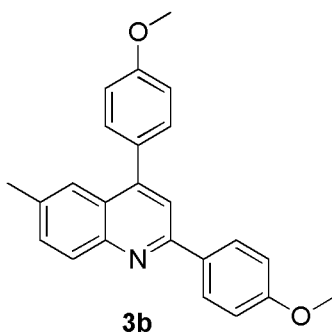

**2,4-bis(4-methoxyphenyl)-6-methylquinoline (3b).**  $^1\text{H}$  NMR (400 MHz,  $\text{CDCl}_3$ )  $\delta$  8.14 (d,  $J$  = 8.5 Hz, 2H), 8.09 (d,  $J$  = 8.5 Hz, 1H), 7.70 (s, 1H), 7.66 (s, 1H), 7.53 (d,  $J$  = 8.5 Hz, 1H), 7.49 (d,  $J$  = 8.4 Hz, 2H), 7.07 (t,  $J$  = 7.6 Hz, 2H), 7.03 (d,  $J$  = 8.6 Hz, 2H), 3.91 (s, 3H), 3.87 (s, 3H), 2.47 (s, 3H);  $^{13}\text{C}$  NMR (100 MHz,  $\text{CDCl}_3$ )  $\delta$  160.7, 159.7, 155.6, 148.0, 147.4, 135.7, 132.4, 131.6, 131.0, 130.8, 129.6, 128.8, 125.6, 124.4, 118.9, 114.2, 114.0, 55.42, 55.40, 21.8; HRMS (TOF)  $m/z$   $[\text{M} + \text{H}]^+$  Calcd for  $\text{C}_{24}\text{H}_{22}\text{NO}_2$  356.1645 found 356.1642.

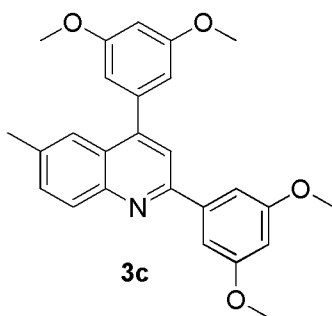

**2,4-bis(3,5-dimethoxyphenyl)-6-methylquinoline (3c).**  $^1\text{H}$  NMR (400 MHz,  $\text{CDCl}_3$ )  $\delta$  8.12 (d,  $J$  = 8.6 Hz, 1H), 7.74 (s, 1H), 7.69 (s, 1H), 7.56 (d,  $J$  = 8.5 Hz, 1H), 7.31 (d,  $J$  = 15.7 Hz, 2H), 6.68 (s, 2H), 6.59 (d,  $J$  = 16.8 Hz, 2H), 3.90 (s, 6H), 3.86 (s, 6H), 2.48 (s, 3H);  $^{13}\text{C}$  NMR (125 MHz,  $\text{CDCl}_3$ )  $\delta$  161.2, 160.8, 155.7, 148.3, 147.2, 141.8, 140.5, 136.4, 131.8, 129.8, 125.8, 124.4, 119.2, 107.7, 105.4, 101.7, 100.2, 55.58, 55.56, 21.9; HRMS (TOF)  $m/z$   $[\text{M} + \text{H}]^+$  Calcd for  $\text{C}_{26}\text{H}_{26}\text{NO}_4$  416.1856 found 416.1864.

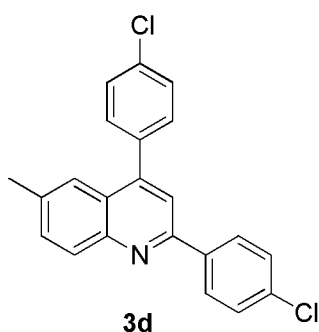

**2,4-bis(4-chlorophenyl)-6-methylquinoline (3d).**  $^1\text{H}$  NMR (500 MHz,  $\text{CDCl}_3$ )  $\delta$  8.12 (dd,  $J$  = 7.9, 5.9 Hz, 3H), 7.70 (s, 1H), 7.58 (d,  $J$  = 8.1 Hz, 2H), 7.54 (d,  $J$  = 8.3 Hz, 2H), 7.48 (dd,  $J$  = 8.4, 1.5 Hz, 4H), 2.48 (s, 3H);  $^{13}\text{C}$  NMR (125 MHz,  $\text{CDCl}_3$ )  $\delta$  153.3, 146.1, 146.0, 136.6, 135.5, 134.1, 133.3, 130.8, 129.5, 128.5, 127.7, 127.6, 127.4, 124.2, 122.7, 117.5, 20.5; HRMS (TOF)  $m/z$   $[\text{M} + \text{H}]^+$  Calcd for  $\text{C}_{22}\text{H}_{16}\text{Cl}_2\text{N}$  364.0654 found 364.0652.

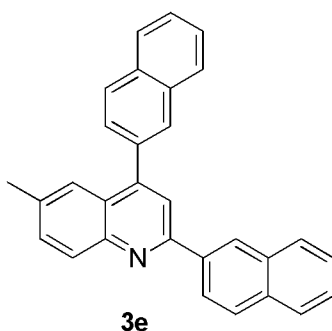

**6-methyl-2,4-di(naphthalen-2-yl)quinoline (3e).**  $^1\text{H}$  NMR (400 MHz,  $\text{CDCl}_3$ )  $\delta$  8.65 (s, 1H), 8.42 (d,  $J$  = 8.5 Hz, 1H), 8.21 (d,  $J$  = 8.5 Hz, 1H), 8.10 – 7.83 (m, 8H), 7.71 (d,  $J$  = 9.2 Hz, 2H), 7.65 – 7.44 (m, 5H), 2.47 (s, 3H);  $^{13}\text{C}$  NMR (100 MHz,  $\text{CDCl}_3$ )  $\delta$  155.8, 148.5, 147.5, 137.0, 136.5, 136.2, 133.8, 133.6, 133.3, 133.1, 131.9, 129.9, 128.8, 128.6, 128.5, 128.3, 128.2, 127.8, 127.7,

127.51, 127.0, 126.7, 126.67, 126.63, 126.3, 125.9, 125.1, 124.5, 119.8, 21.8; HRMS (TOF)  $m/z$   $[M + H]^+$  Calcd for  $C_{30}H_{22}N$  396.1747 found 396.1719.

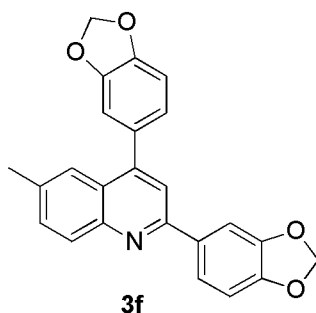

**2,4-bis(benzo[d][1,3]dioxol-5-yl)-6-methylquinoline (3f).**  $^1H$  NMR (400 MHz,  $CDCl_3$ )  $\delta$  8.07 (d,  $J = 8.5$  Hz, 1H), 7.74 (s, 1H), 7.69 – 7.61 (m, 3H), 7.54 (d,  $J = 8.4$  Hz, 1H), 7.05 – 6.88 (m, 4H), 6.09 (s, 2H), 6.04 (s, 2H), 2.48 (s, 3H);  $^{13}C$  NMR (100 MHz,  $CDCl_3$ )  $\delta$  155.6, 148.7, 148.4, 148.0, 147.8, 147.7, 147.31, 136.0, 134.2, 132.4, 131.7, 129.7, 125.6, 124.3, 123.2, 121.6, 118.9, 110.0, 108.5, 108.4, 107.8, 101.4, 101.3, 21.8; HRMS (TOF)  $m/z$   $[M + H]^+$  Calcd for  $C_{24}H_{18}NO_4$  384.1230 found 384.1238.

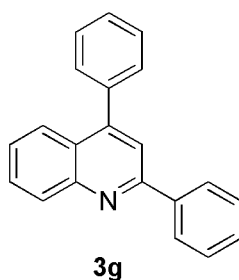

**2,4-diphenylquinoline (3g).**  $^1H$  NMR (400 MHz,  $CDCl_3$ )  $\delta$  8.25 (d,  $J = 8.4$  Hz, 1H), 8.20 (d,  $J = 7.7$  Hz, 2H), 7.91 (d,  $J = 8.2$  Hz, 1H), 7.83 (s, 1H), 7.74 (t,  $J = 7.6$  Hz, 1H), 7.60 – 7.42 (m, 9H);  $^{13}C$  NMR (100 MHz,  $CDCl_3$ )  $\delta$  156.9, 149.2, 148.8, 139.7, 138.4, 130.1, 129.6, 129.5, 129.3, 128.8, 128.6, 128.4, 127.6, 126.3, 125.8, 125.6, 119.3; HRMS (TOF)  $m/z$   $[M + H]^+$  Calcd for  $C_{21}H_{16}N$  282.1277 found 282.1279.

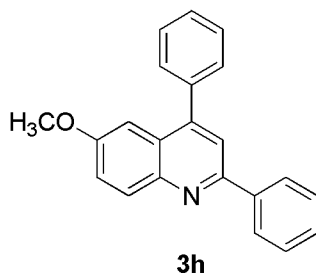

**6-methoxy-2,4-diphenylquinoline (3h).**  $^1\text{H}$  NMR (400 MHz,  $\text{CDCl}_3$ )  $\delta$  8.15 (d,  $J = 7.0$  Hz, 3H), 7.77 (s, 1H), 7.61 – 7.35 (m, 10H), 7.19 (d,  $J = 2.8$ , 1H), 3.80 (s, 3H);  $^{13}\text{C}$  NMR (100 MHz,  $\text{CDCl}_3$ )  $\delta$  157.8, 154.7, 147.8, 144.9, 139.8, 138.8, 131.7, 129.4, 129.1, 128.8, 128.7, 128.4, 127.3, 126.7, 121.8, 119.7, 103.7, 55.5; HRMS (TOF)  $m/z$   $[\text{M} + \text{H}]^+$  Calcd for  $\text{C}_{22}\text{H}_{18}\text{NO}$  312.1383 found 312.1368.

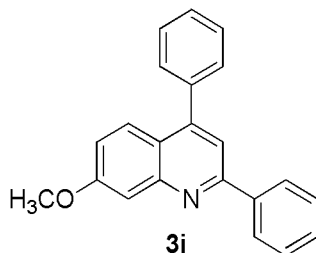

**7-methoxy-2,4-diphenylquinoline (3i).**  $^1\text{H}$  NMR (500 MHz,  $\text{CDCl}_3$ )  $\delta$  8.11 (s, 1H), 7.76 (d,  $J = 8.9$  Hz, 1H), 7.53 (d,  $J = 2.4$  Hz, 2H), 7.46 – 7.40 (m, 2H), 7.31 – 7.19 (m, 9H), 3.98 (s, 3H);  $^{13}\text{C}$  NMR (125 MHz,  $\text{CDCl}_3$ )  $\delta$  160.9, 158.5, 148.9, 140.6, 140.1, 137.3, 132.4, 129.9, 129.8, 128.5, 128.2, 127.94, 127.90, 126.9, 122.4, 120.1, 107.3 55.6.

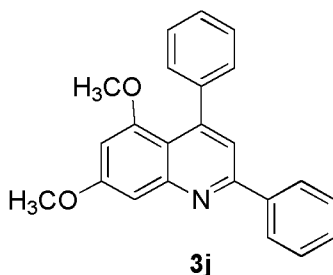

**5,7-dimethoxy-2,4-diphenylquinoline (3j).**  $^1\text{H}$  NMR (400 MHz,  $\text{CDCl}_3$ )  $\delta$  8.46 (s, 1H), 7.48 – 7.38 (m, 2H), 7.26 (dd,  $J = 8.0, 4.3$  Hz, 9H), 6.54 (d,  $J = 1.6$  Hz, 1H), 3.99 (s, 3H), 3.96 (s, 3H);  $^{13}\text{C}$  NMR (100 MHz,  $\text{CDCl}_3$ )  $\delta$  161.5, 158.8, 156.1, 149.3, 140.7, 140.4, 132.6, 131.5, 129.9,

129.8, 128.1, 127.9, 127.8, 126.8, 115.7, 99.7, 98.3 55.8, 55.7; HRMS (TOF)  $m/z$   $[M + H]^+$  Calcd for  $C_{23}H_{20}NO_2$  342.1489 found 342.1484.

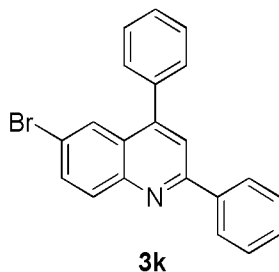

**6-bromo-2,4-diphenylquinoline (3k).**  $^1H$  NMR (400 MHz,  $CDCl_3$ )  $\delta$  8.18 (d,  $J = 7.9$  Hz, 2H), 8.10 (d,  $J = 9.0$  Hz, 1H), 8.04 (s, 1H), 7.86 – 7.76 (m, 2H), 7.60 – 7.46 (m, 8H);  $^{13}C$  NMR (100 MHz,  $CDCl_3$ )  $\delta$  157.2, 148.4, 147.4, 139.2, 137.7, 133.0, 131.8, 129.6, 129.4, 128.9, 128.8, 128.7, 127.8, 127.5, 127.0, 120.4, 120.0; HRMS (TOF)  $m/z$   $[M + H]^+$  Calcd for  $C_{21}H_{15}BrN$  360.0382 found 360.0372.

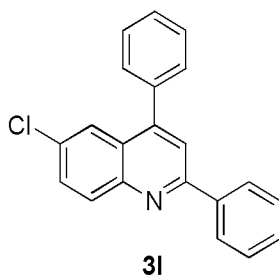

**6-chloro-2,4-diphenylquinoline (3l).**  $^1H$  NMR (400 MHz,  $CDCl_3$ )  $\delta$  8.16 (dd,  $J = 8.0, 4.5$  Hz, 3H), 7.85 (s, 1H), 7.81 (s, 1H), 7.64 (d,  $J = 8.9$  Hz, 1H), 7.58 – 7.44 (m, 8H);  $^{13}C$  NMR (100 MHz,  $CDCl_3$ )  $\delta$  157.1, 148.4, 147.2, 139.2, 137.7, 132.2, 131.7, 130.4, 129.6, 129.4, 128.9, 128.8, 128.7, 127.6, 126.5, 124.5, 120.0; HRMS (TOF)  $m/z$   $[M + H]^+$  Calcd for  $C_{21}H_{15}ClN$  316.0888 found 316.0892.

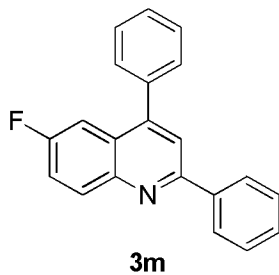

**6-fluoro-2,4-diphenylquinoline (3m).**  $^1\text{H}$  NMR (400 MHz,  $\text{CDCl}_3$ )  $\delta$  8.21 (dd,  $J = 8.8, 5.7$  Hz, 1H), 8.16 (d,  $J = 7.8$  Hz, 2H), 7.81 (s, 1H), 7.55 – 7.42 (m, 10H);  $^{13}\text{C}$  NMR (100 MHz,  $\text{CDCl}_3$ )  $\delta$  161.8 (d,  $^1J_{\text{C-F}} = 245$  Hz), 156.3, 148.7, 146.0, 139.4, 138.0, 132.6, 129.45, 129.41, 128.9, 128.8, 128.6, 127.5, 126.6, 119.8, 119.8 (d,  $^2J_{\text{C-F}} = 26$  Hz), 109.2 (d,  $^2J_{\text{C-F}} = 23$  Hz); HRMS (TOF)  $m/z$   $[\text{M} + \text{H}]^+$  Calcd for  $\text{C}_{21}\text{H}_{15}\text{FN}$  300.1183 found 300.1194

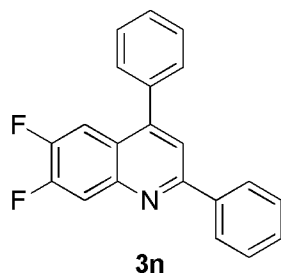

**6,7-difluoro-2,4-diphenylquinoline (3n).**  $^1\text{H}$  NMR (400 MHz,  $\text{CDCl}_3$ )  $\delta$  8.17 (d,  $J = 7.2$  Hz, 2H), 7.98 (dd,  $J = 11.3, 7.9$  Hz, 1H), 7.82 (s, 1H), 7.67 – 7.46 (m, 9H);  $^{13}\text{C}$  NMR (100 MHz,  $\text{CDCl}_3$ )  $\delta$  155.5, 151.5 (d,  $^1J_{\text{C-F}} = 202$  Hz), 151.4 (d,  $^1J_{\text{C-F}} = 203$  Hz), 149.2 (d,  $^2J_{\text{C-F}} = 12$  Hz), 147.2 (d,  $^2J_{\text{C-F}} = 13$  Hz), 146.9, 137.1, 135.8, 127.8, 127.4, 127.1, 127.06, 127.02, 121.0, 117.5, 114.3 (d,  $^2J_{\text{C-F}} = 13$  Hz), 109.6 (d,  $^2J_{\text{C-F}} = 16$  Hz); HRMS (TOF)  $m/z$   $[\text{M} + \text{H}]^+$  Calcd for  $\text{C}_{21}\text{H}_{14}\text{F}_2\text{N}$  318.1089 found 318.1083.

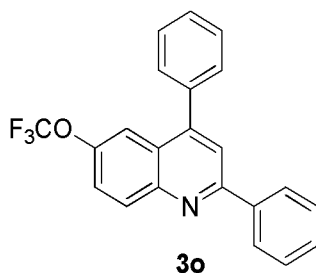

**2,4-diphenyl-6-(trifluoromethoxy)quinoline (3o).**  $^1\text{H}$  NMR (400 MHz,  $\text{CDCl}_3$ )  $\delta$  8.28 (d,  $J = 9.2$  Hz, 1H), 8.19 (d,  $J = 7.3$  Hz, 2H), 7.88 (s, 1H), 7.74 (s, 1H), 7.63 – 7.45 (m, 10H);  $^{13}\text{C}$  NMR (100 MHz,  $\text{CDCl}_3$ )  $\delta$  157.4, 149.1, 147.1, 146.9, 139.2, 137.6, 132.3, 129.6, 129.4, 128.9, 128.9, 128.8, 128.5, 127.6, 127.1, 126.0, 123.5, 120.1, 116.4; HRMS (TOF)  $m/z$   $[\text{M} + \text{H}]^+$  Calcd for  $\text{C}_{22}\text{H}_{15}\text{F}_3\text{NO}$  366.1100 found 366.1115.

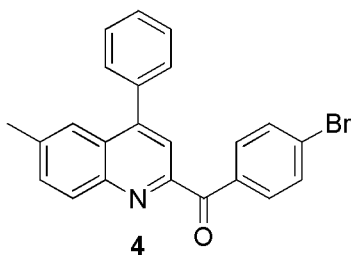

**(4-bromophenyl)(4-phenylquinolin-2-yl)methanone (4).**  $^1\text{H}$  NMR (400 MHz,  $\text{CDCl}_3$ )  $\delta$  8.16 (m, 3H), 8.04 (s, 1H), 7.75 (s, 1H), 7.66 (m, 3H), 7.59 – 7.50 (m, 5H), 2.52 (s, 3H).

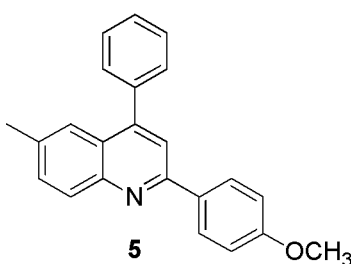

**2-(4-methoxyphenyl)-6-methyl-4-phenylquinoline (5).**  $^1\text{H}$  NMR (400 MHz,  $\text{CDCl}_3$ )  $\delta$  8.12 (dd,  $J = 17.4, 8.7$  Hz, 3H), 7.73 (s, 1H), 7.55 (m, 7H), 7.04 (d,  $J = 8.8$  Hz, 2H), 3.88 (s, 3H), 2.48 (s, 3H).

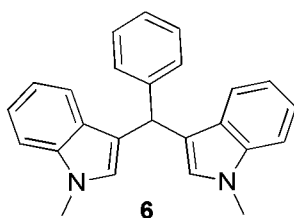

**3,3'-(phenylmethylene)bis(1-methyl-1H-indole) (6).**  $^1\text{H}$  NMR (400 MHz,  $\text{CDCl}_3$ )  $\delta$  7.32 (m, 9H), 7.19 (m, 3H), 6.99 (t,  $J = 7.2$  Hz, 2H), 6.52 (s, 2H), 5.88 (s, 1H), 3.67 (s, 6H).



## Spectral Graphs

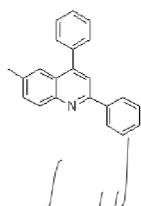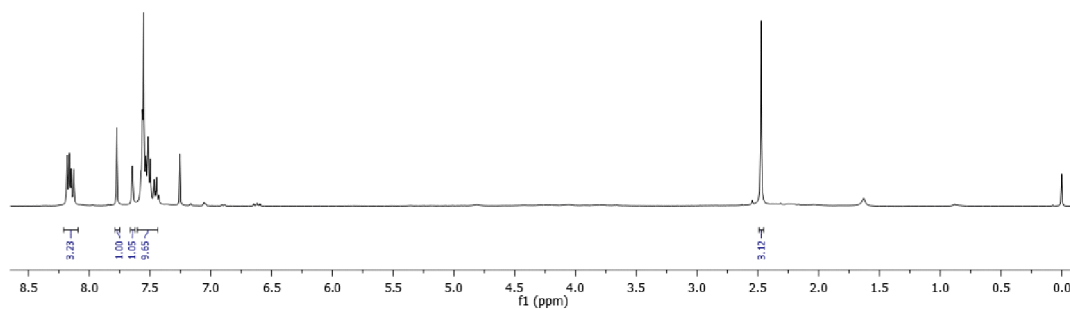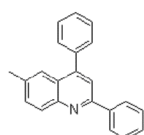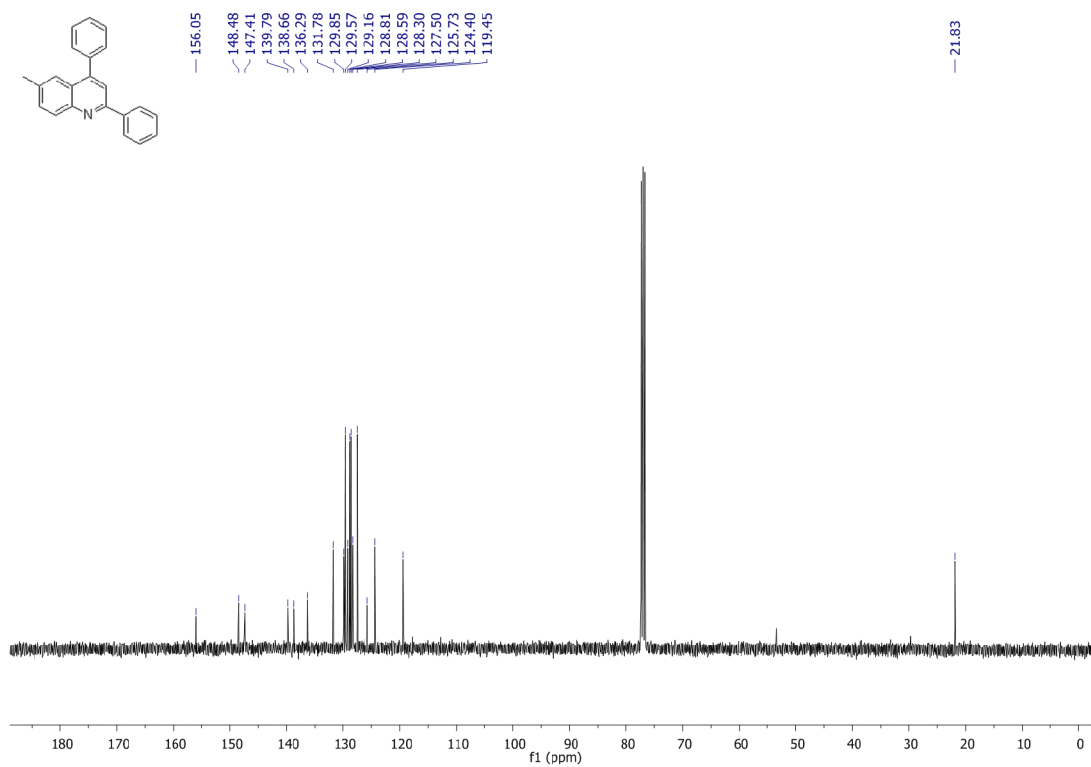

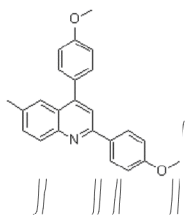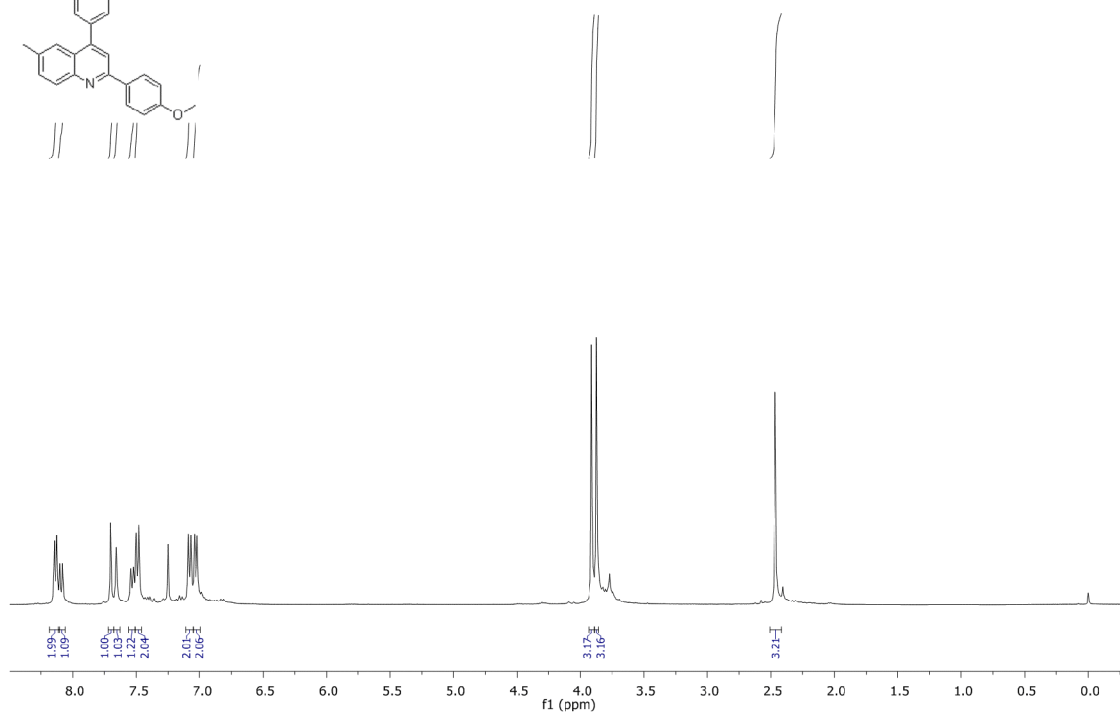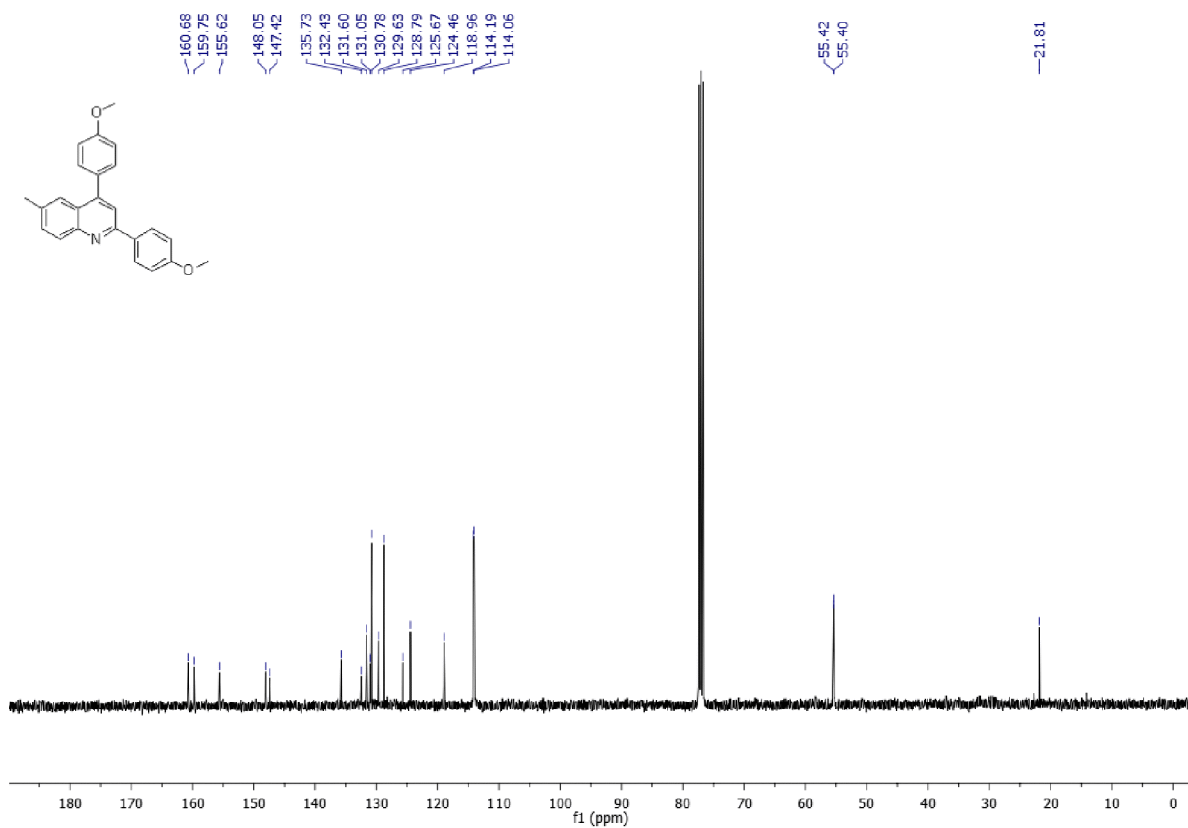

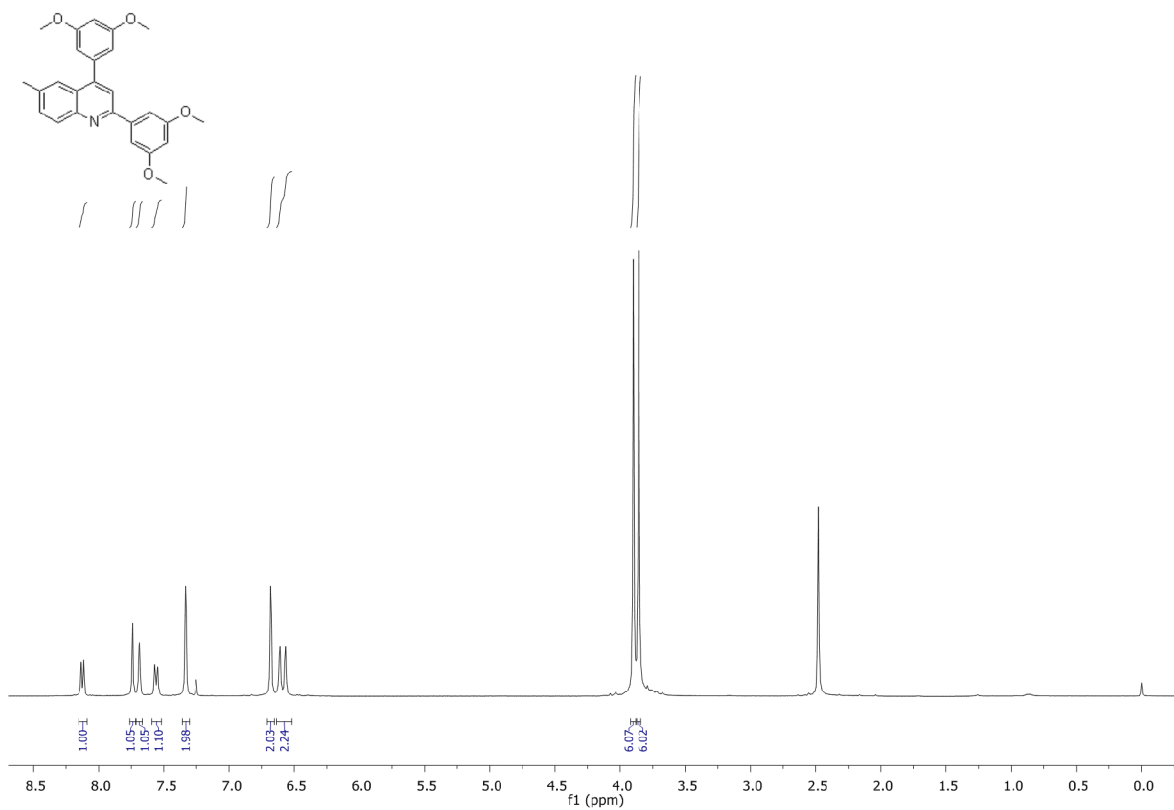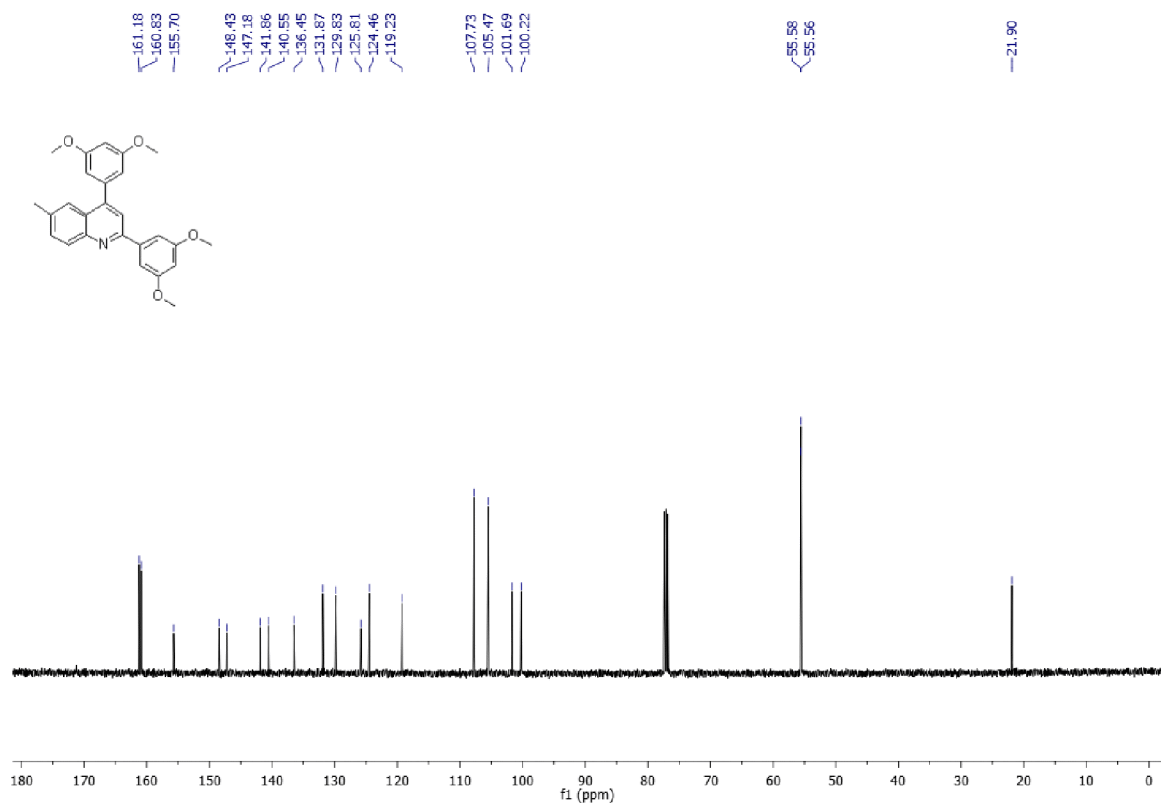

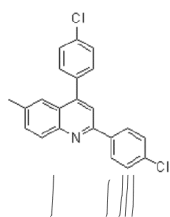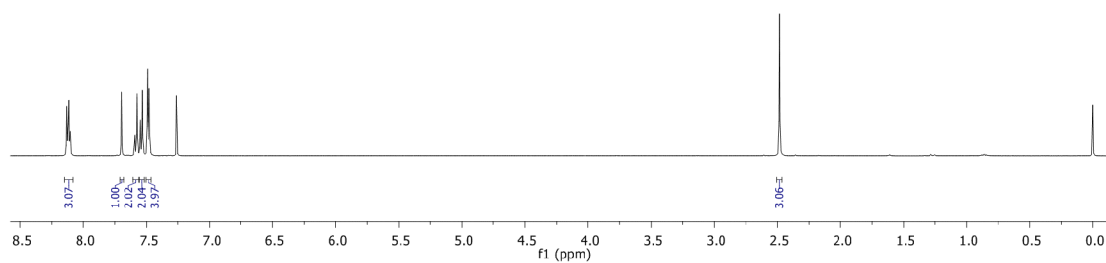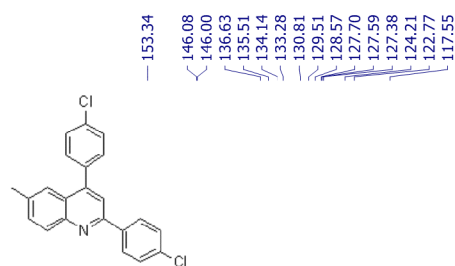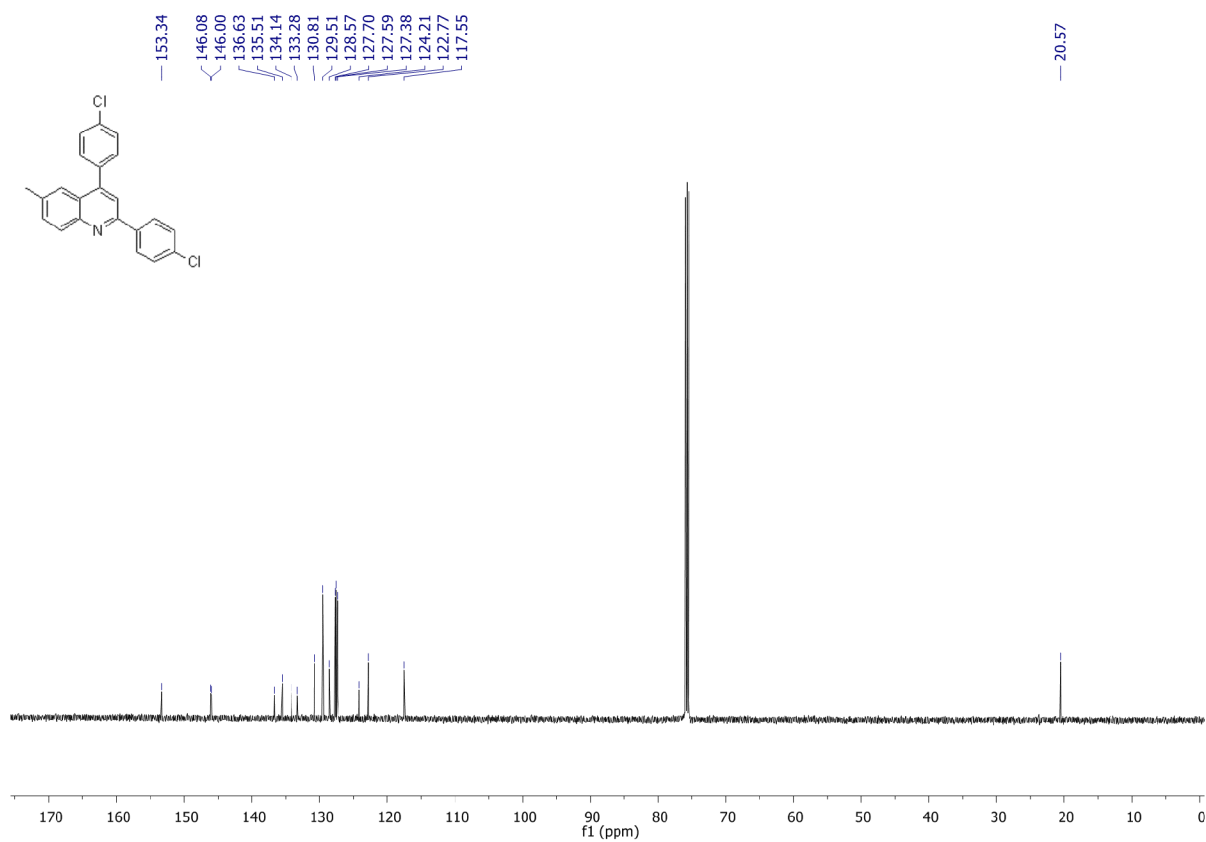

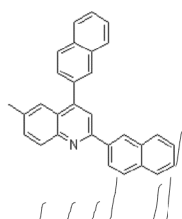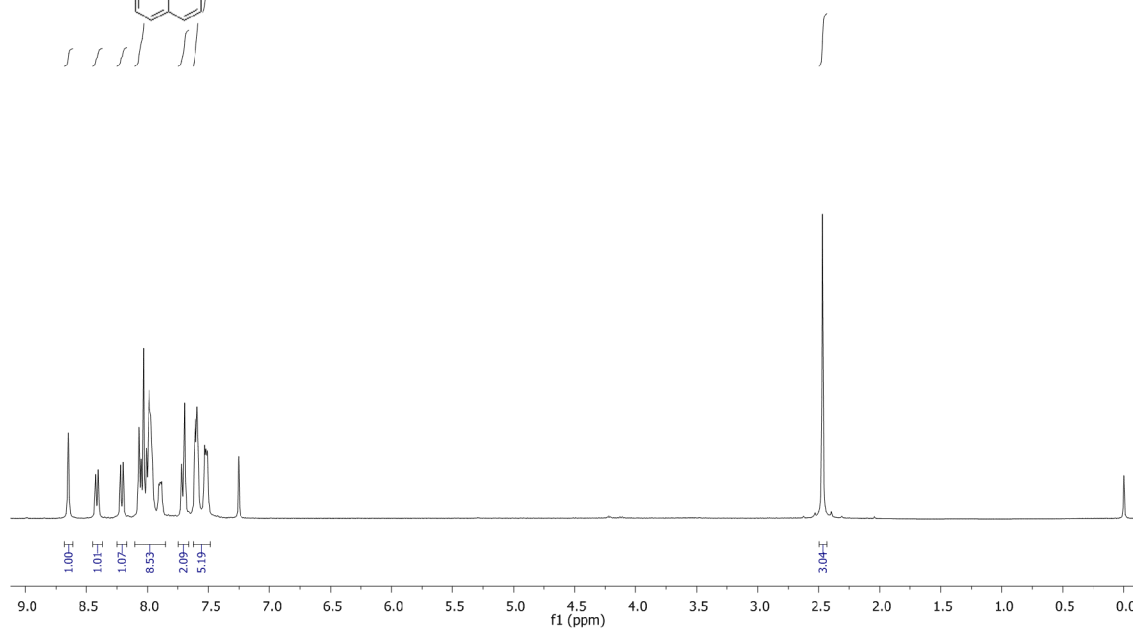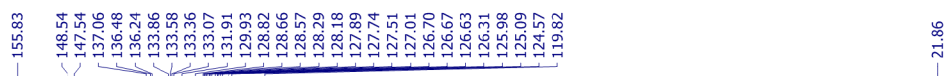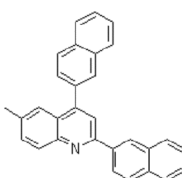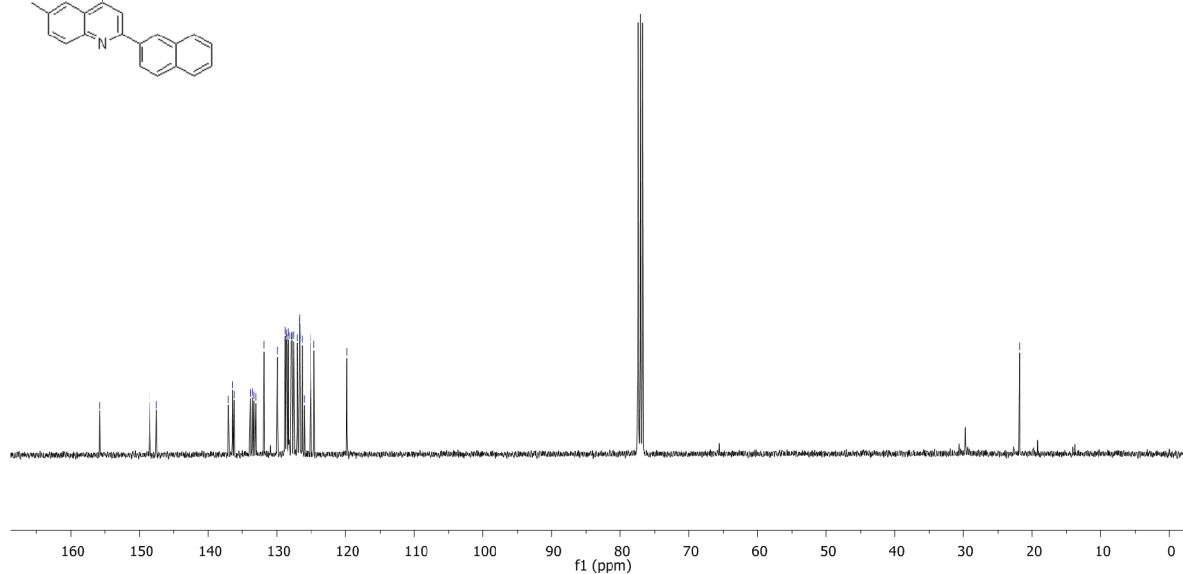

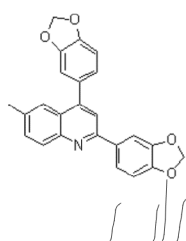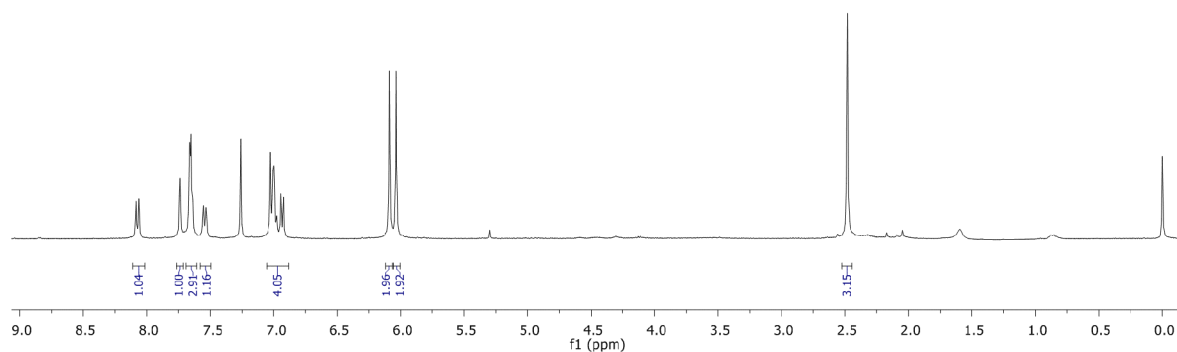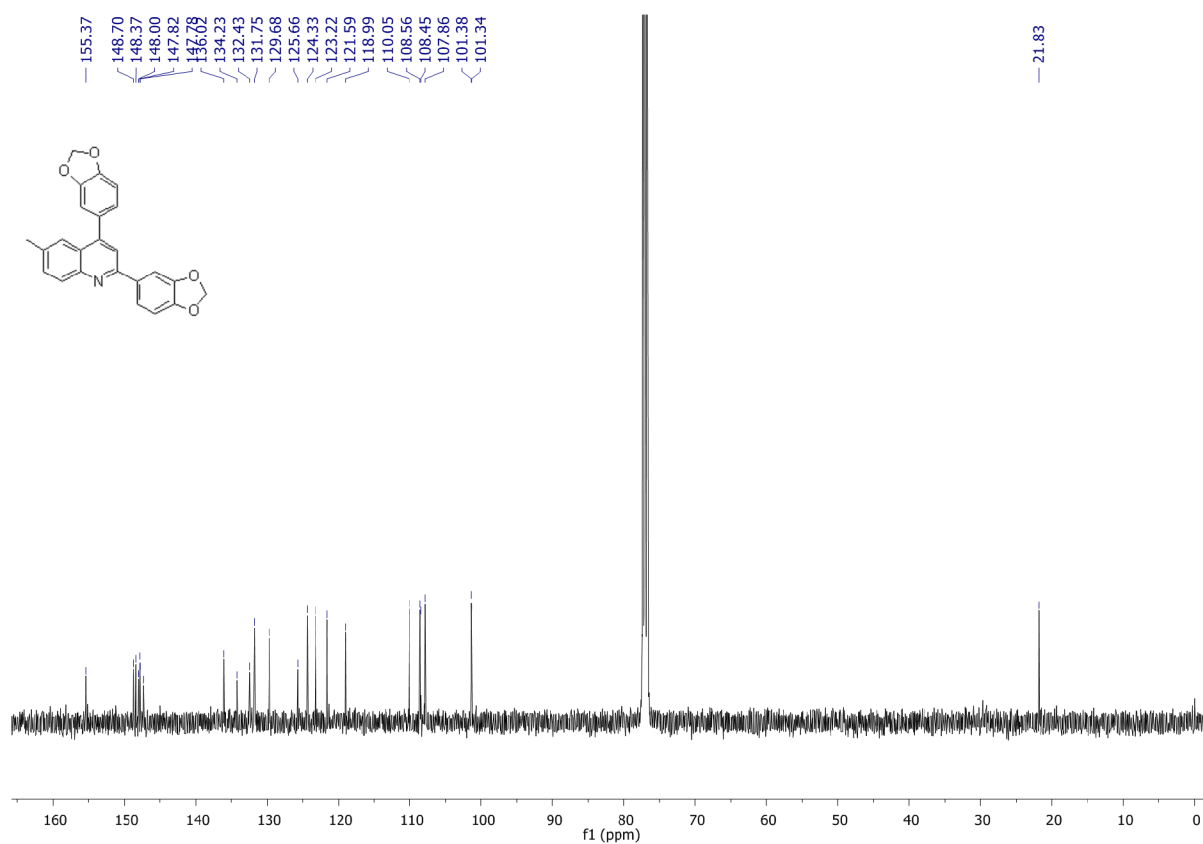

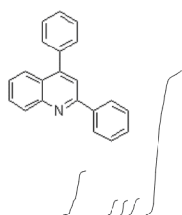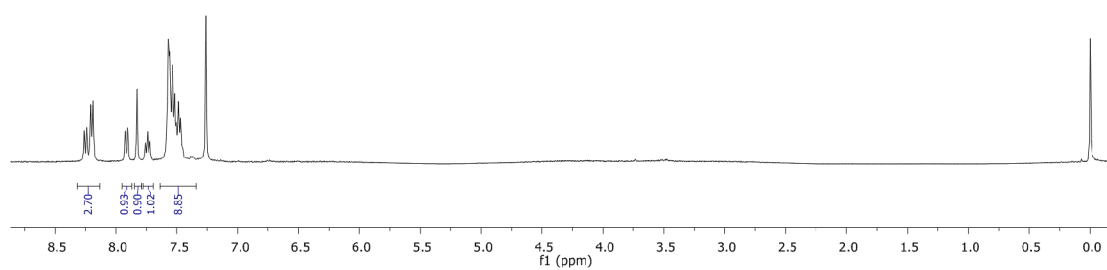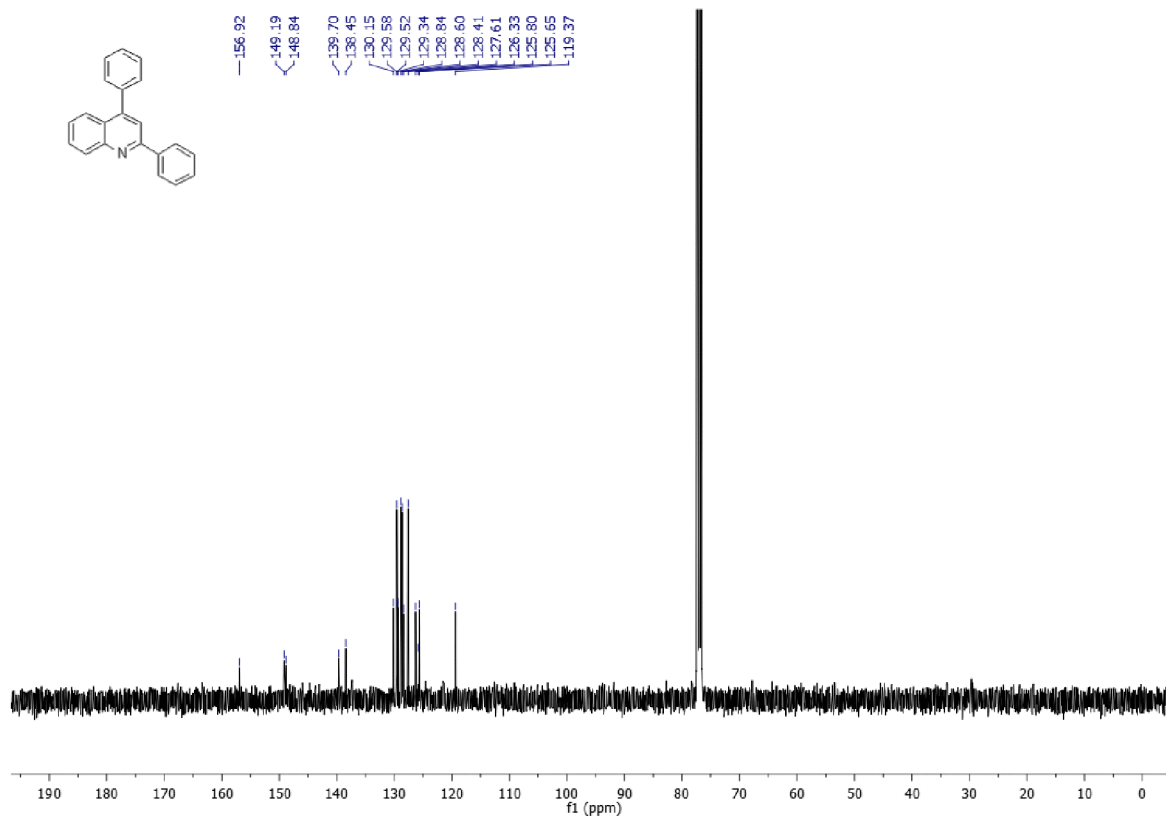

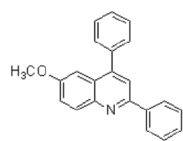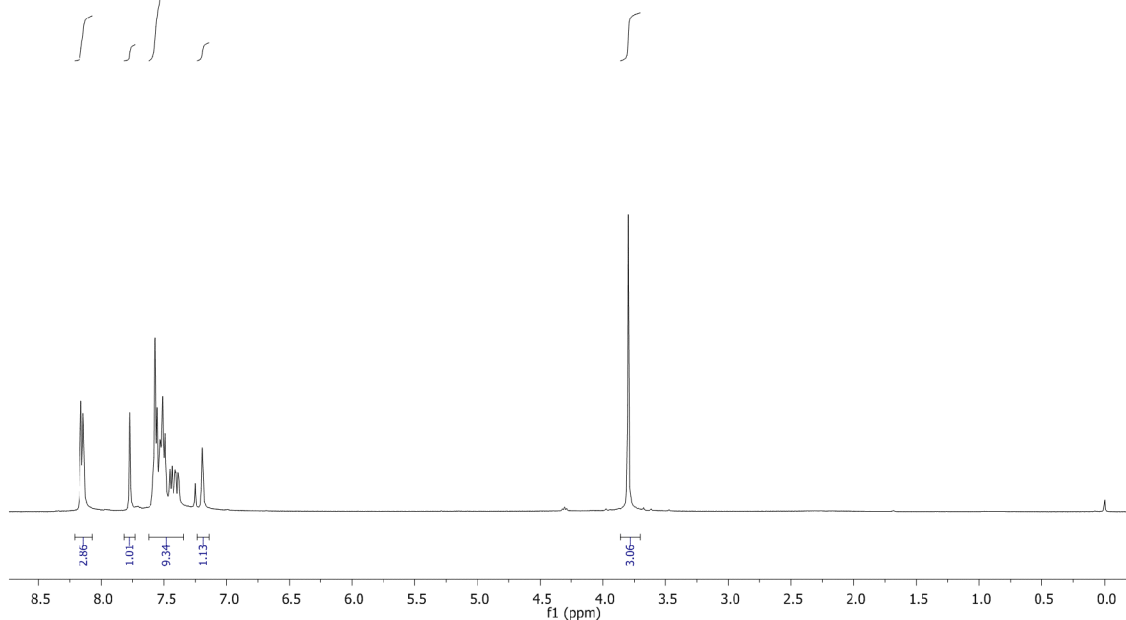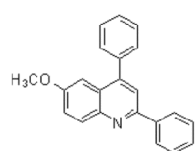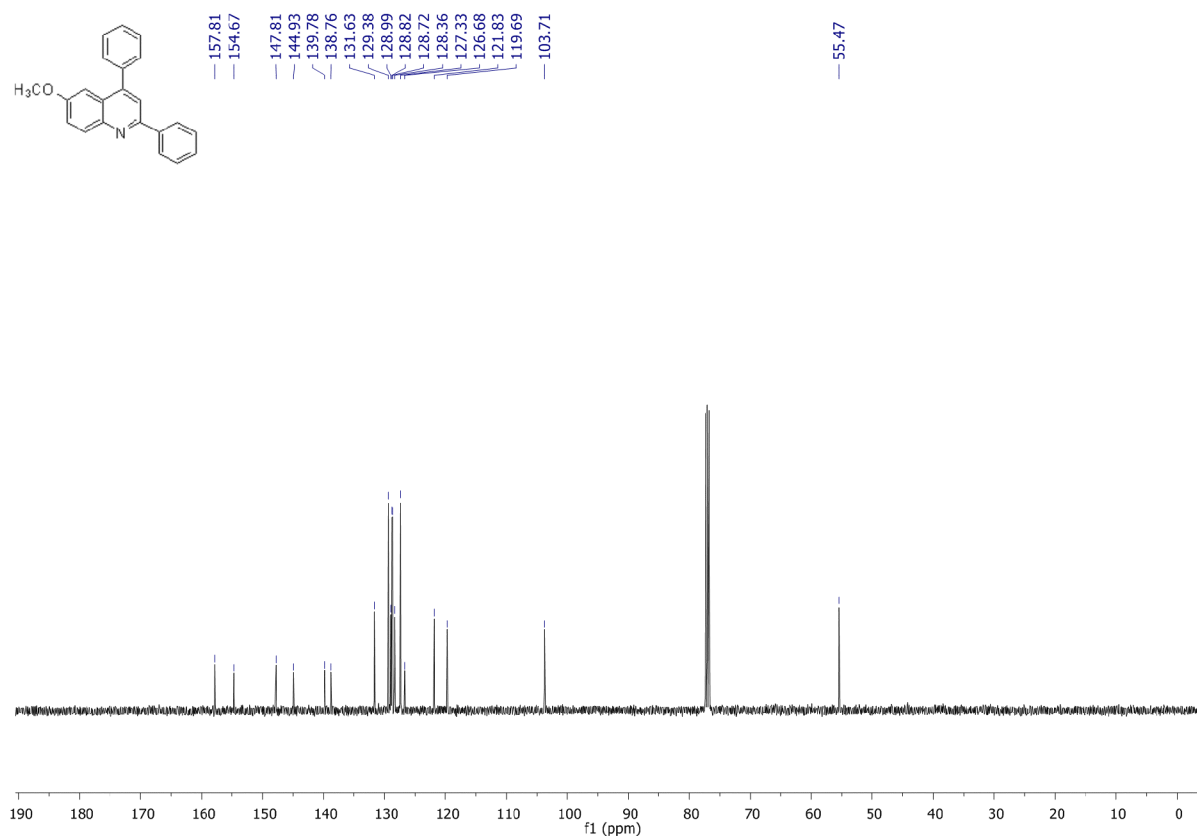



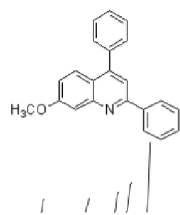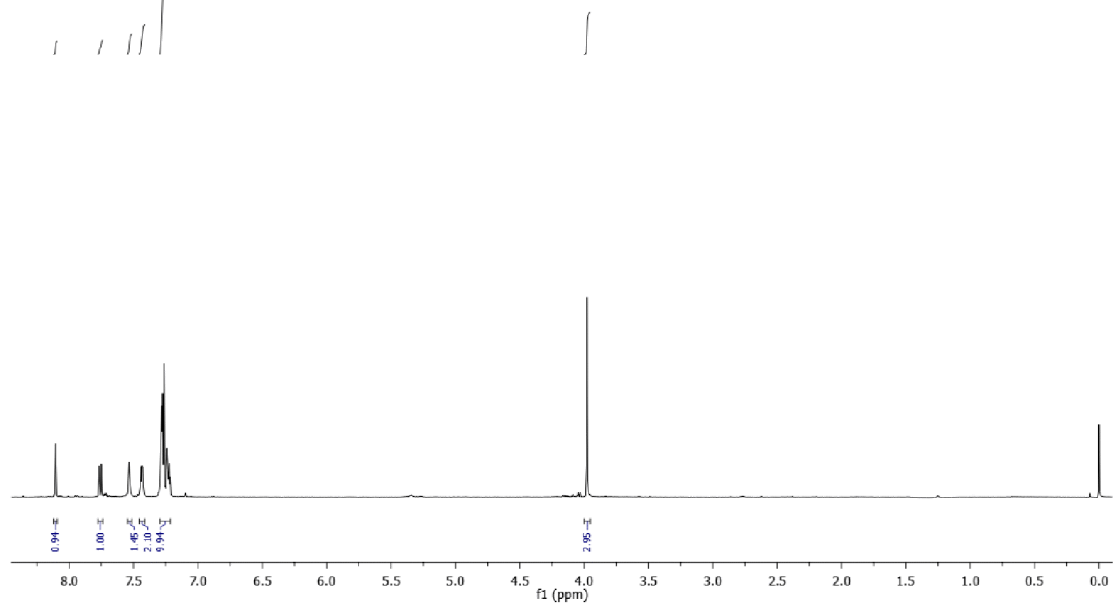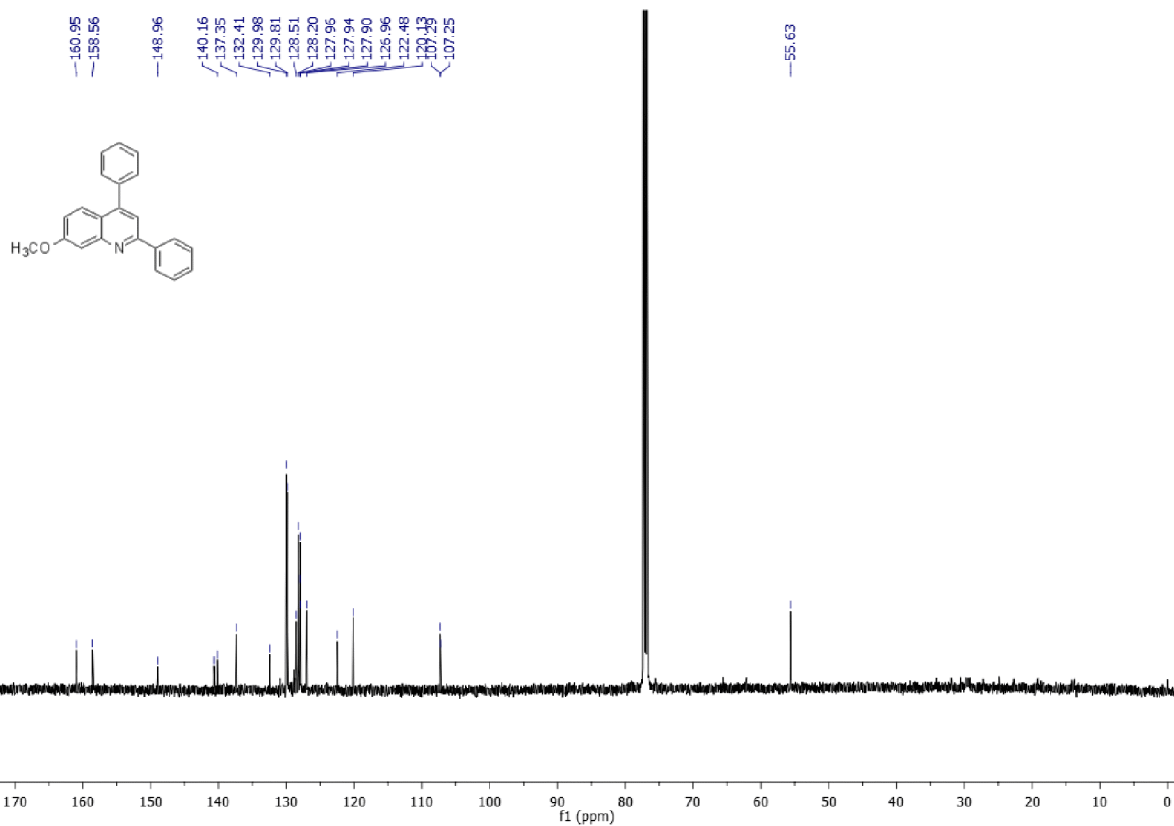

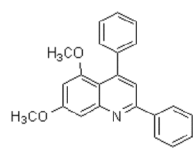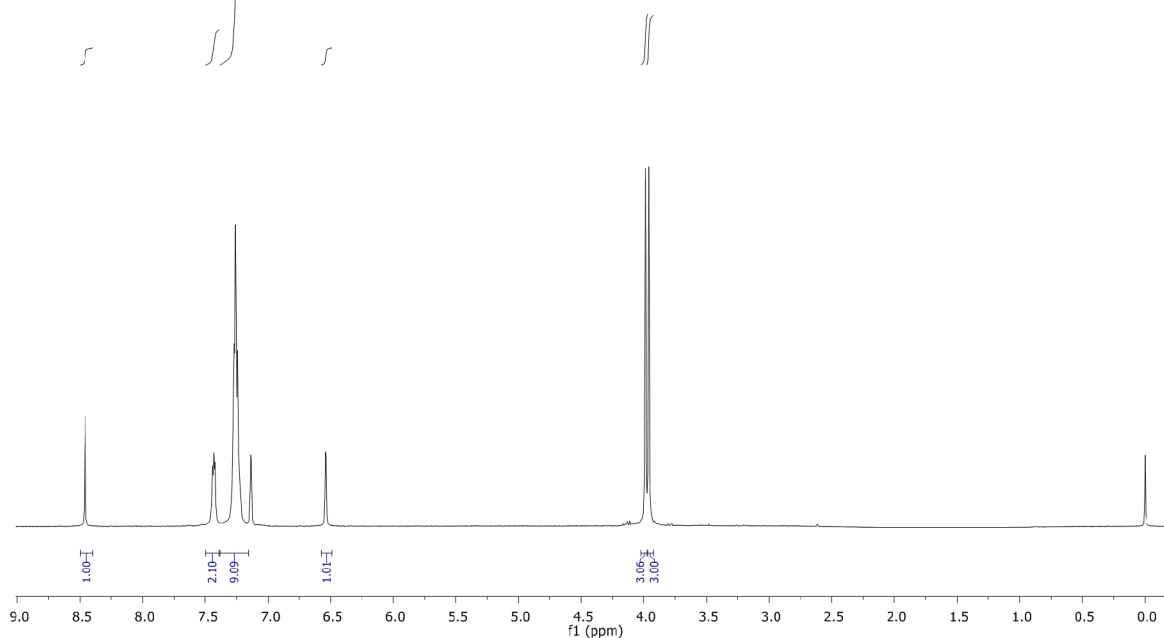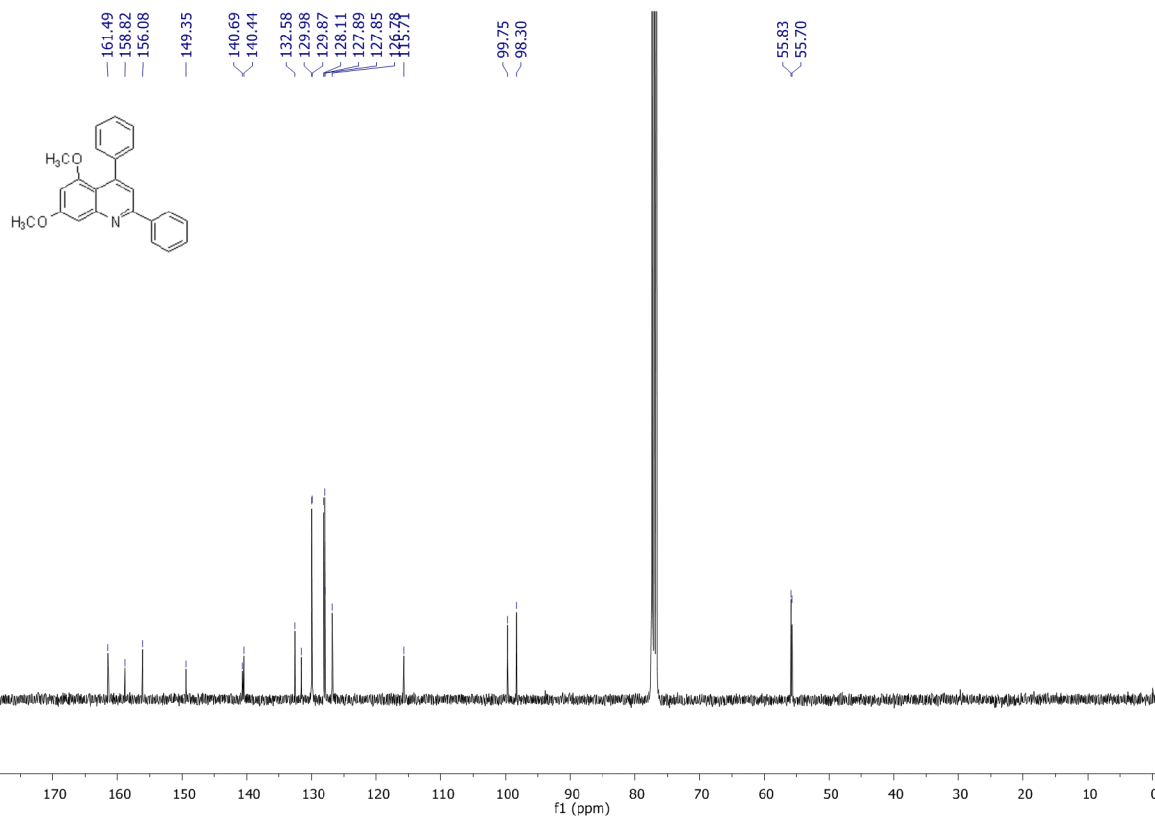

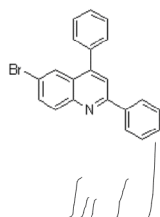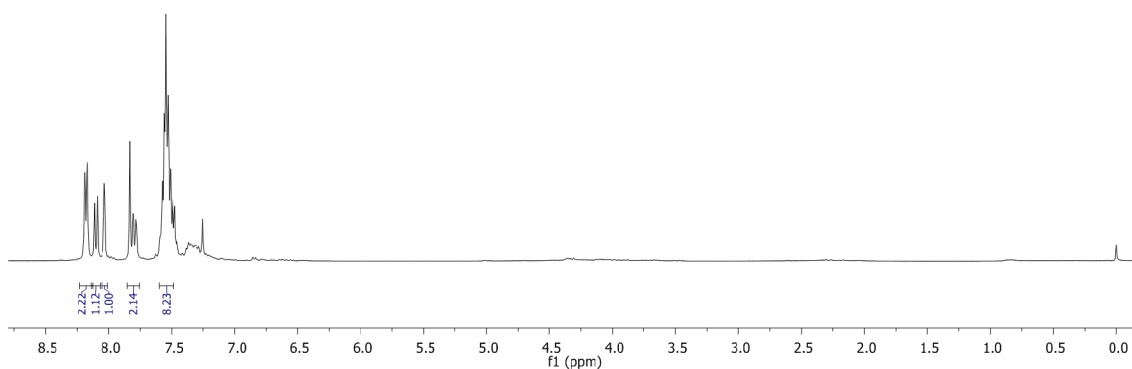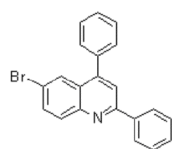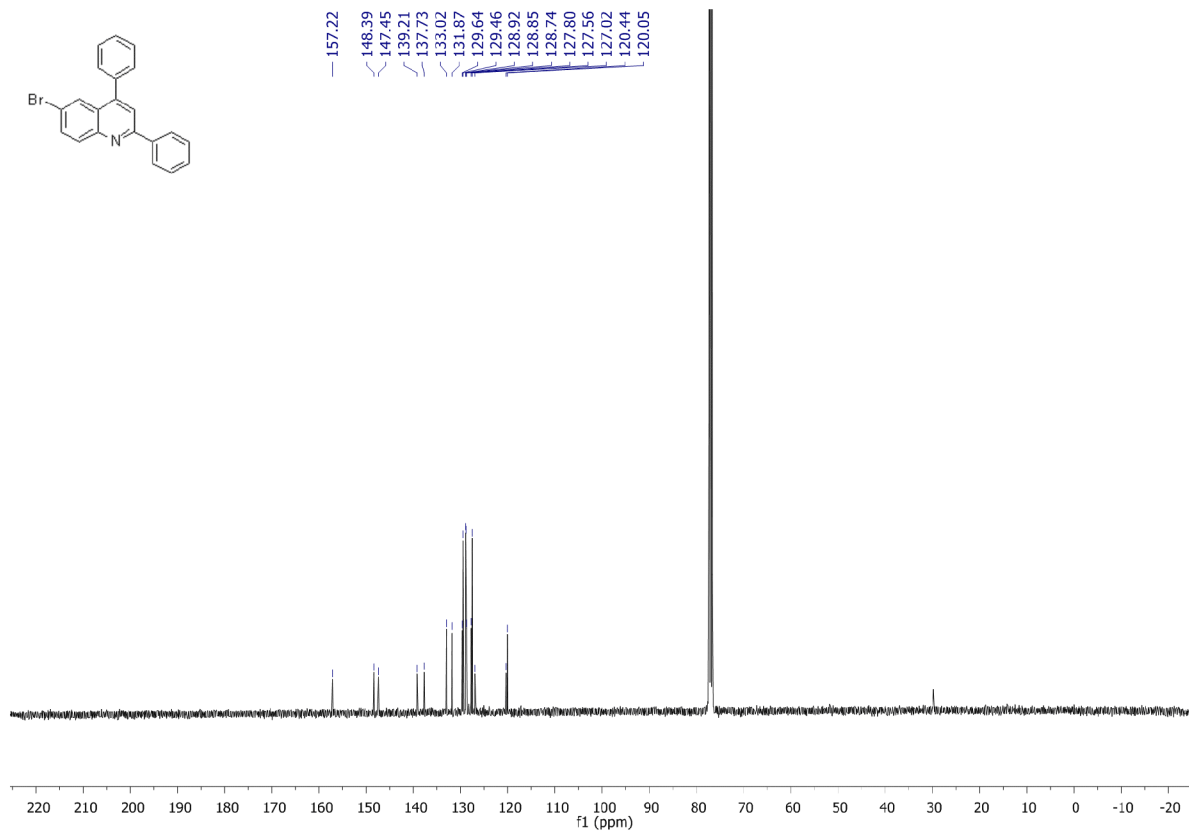

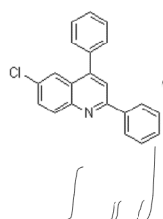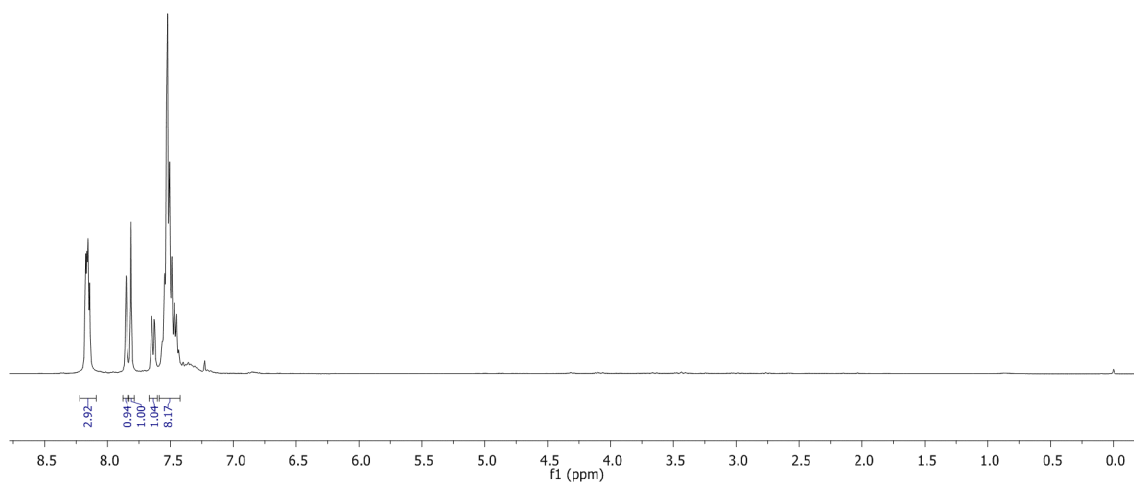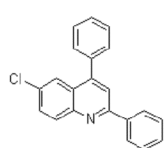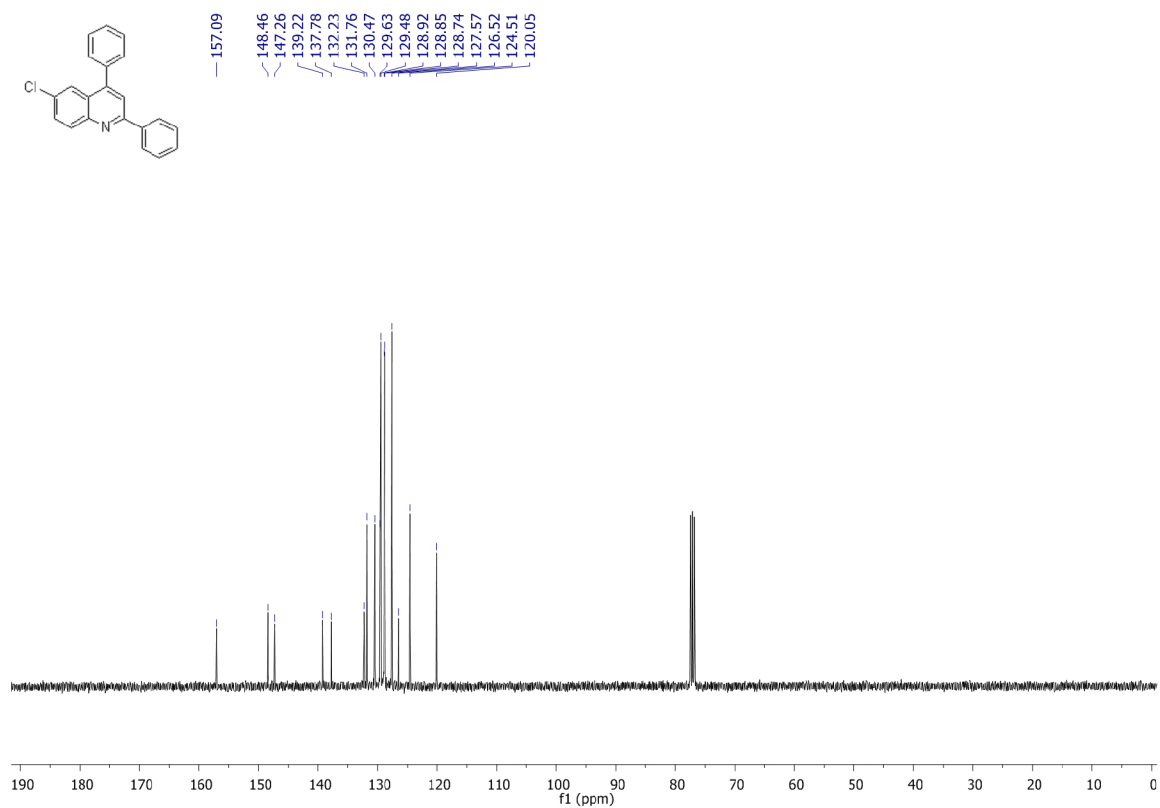

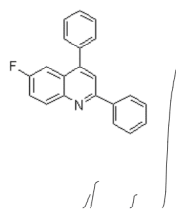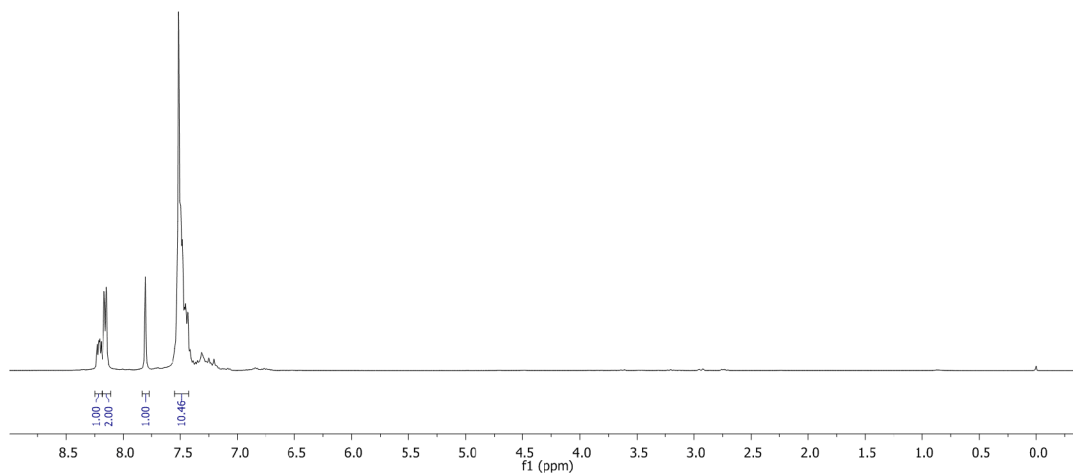

<sup>13</sup>C NMR chemical shifts (ppm):  
 161.86, 159.41, 156.32, 156.30, 148.74, 148.68, 146.01, 132.57, 129.45, 129.41, 128.90, 128.82, 128.68, 127.81, 119.82, 119.56, 109.20, 108.97

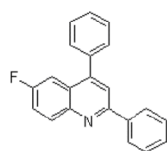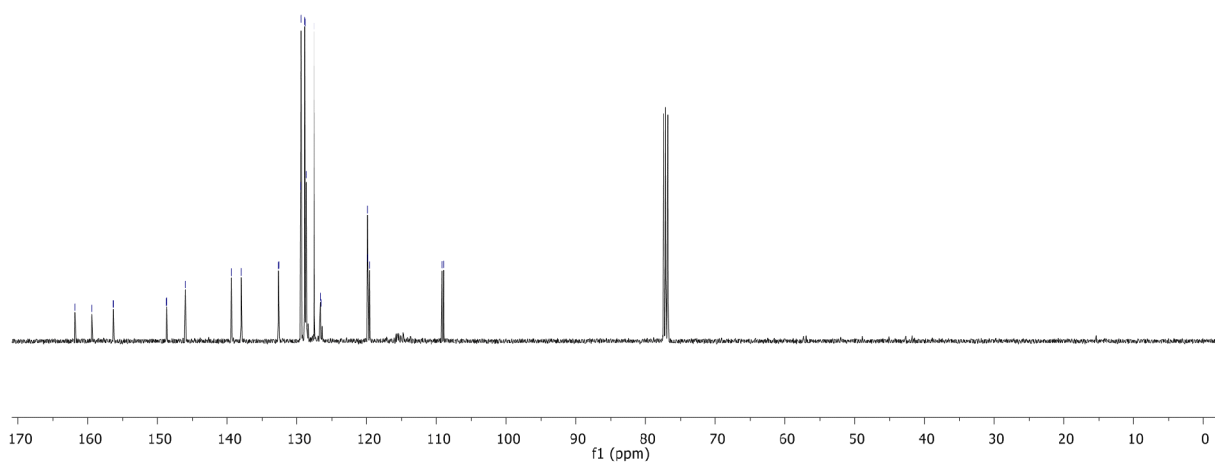

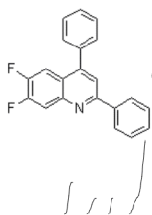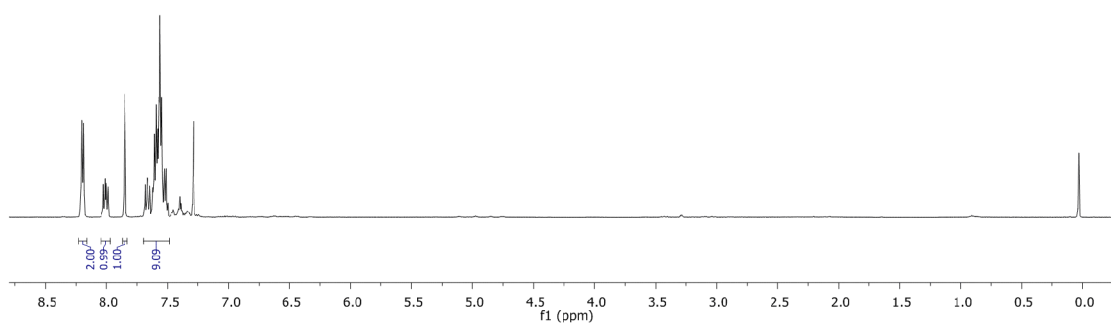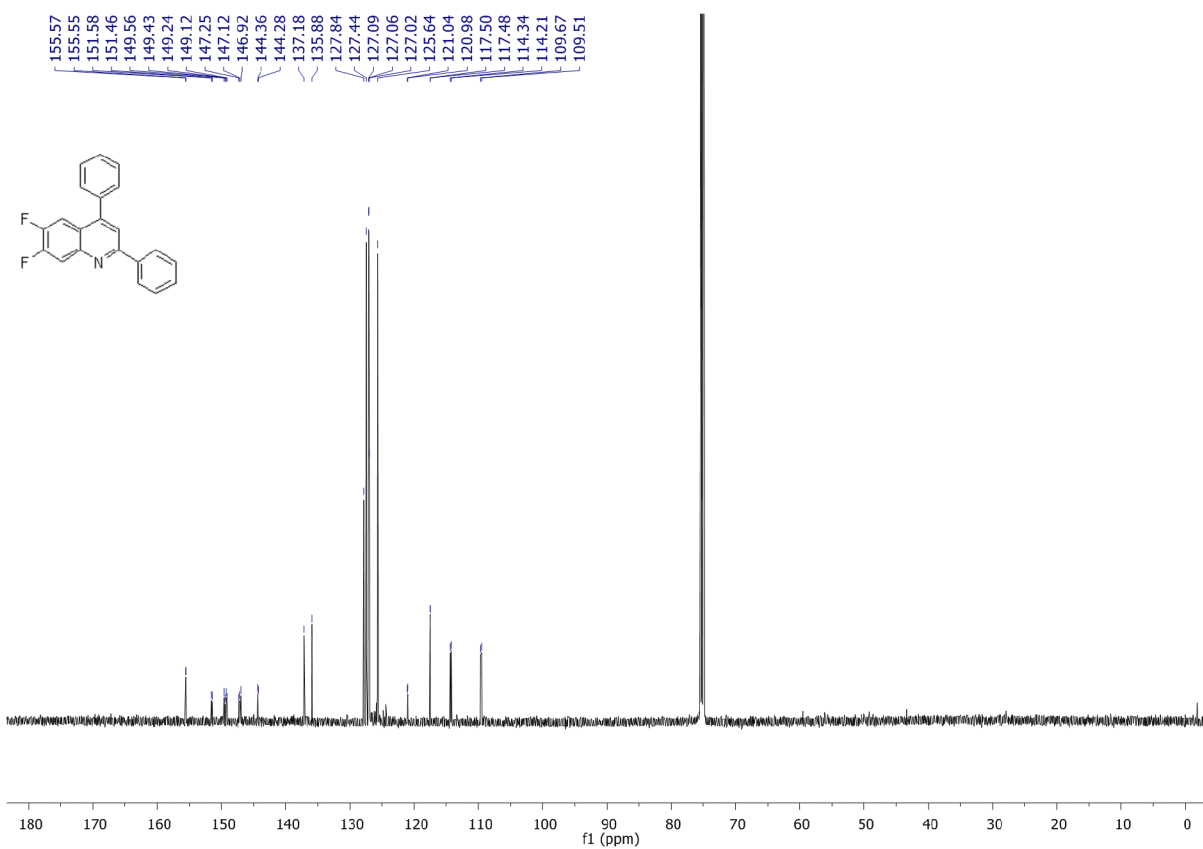

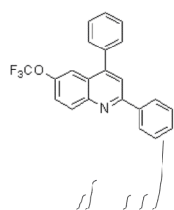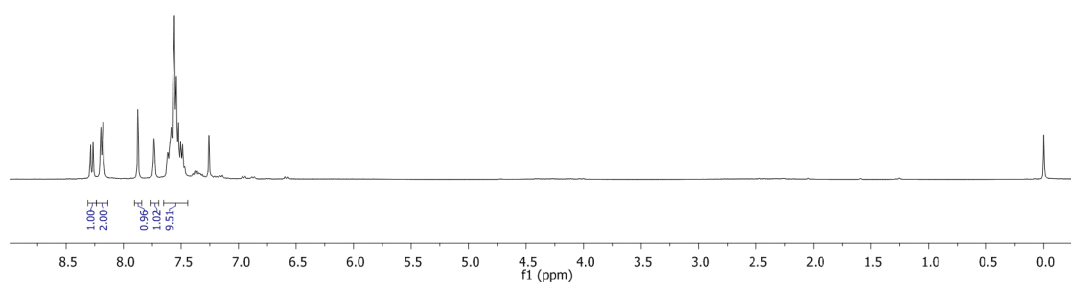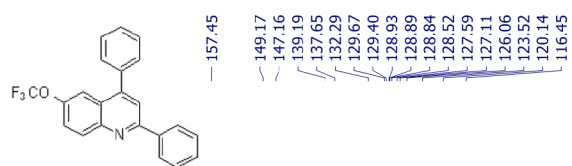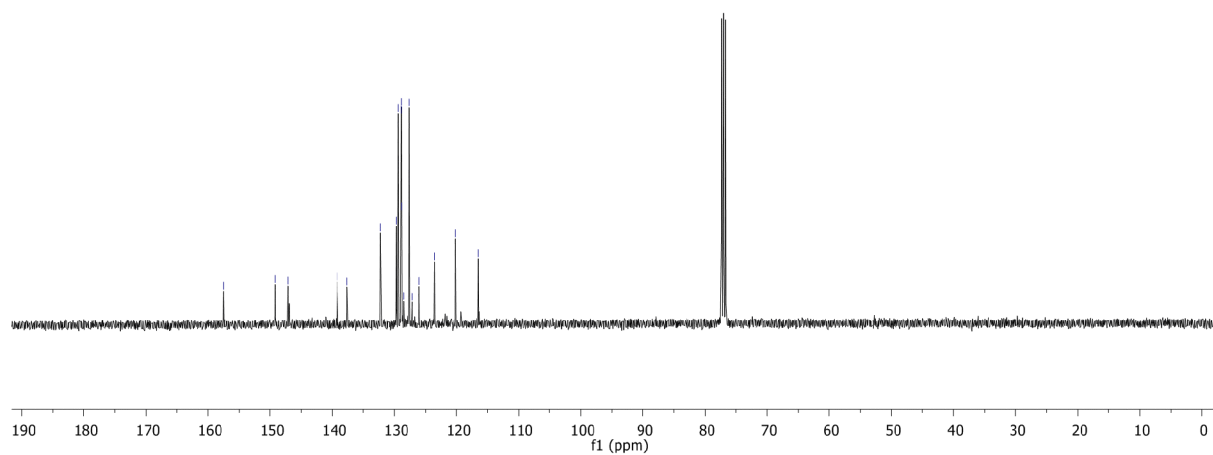

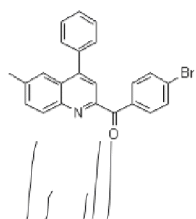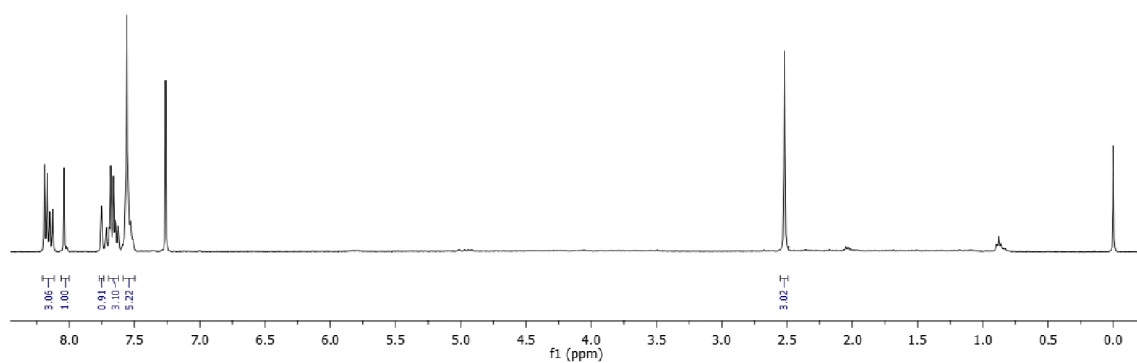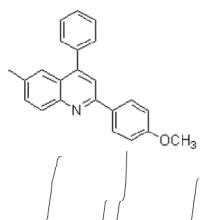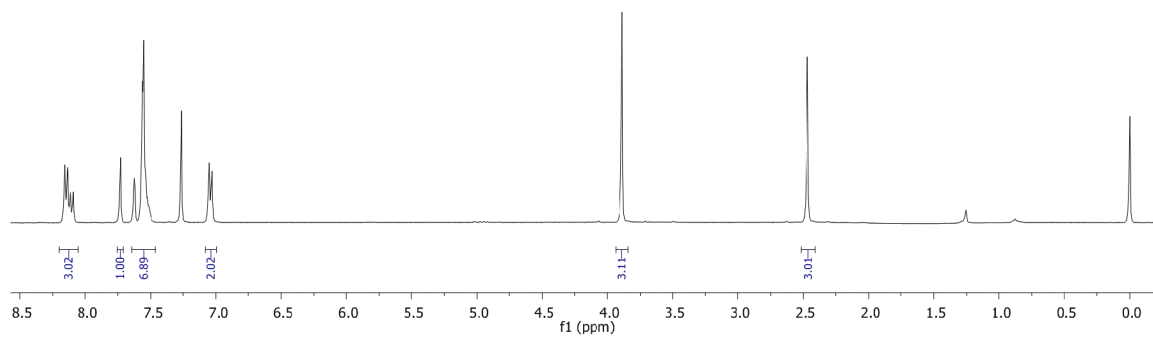



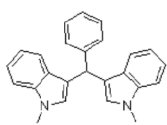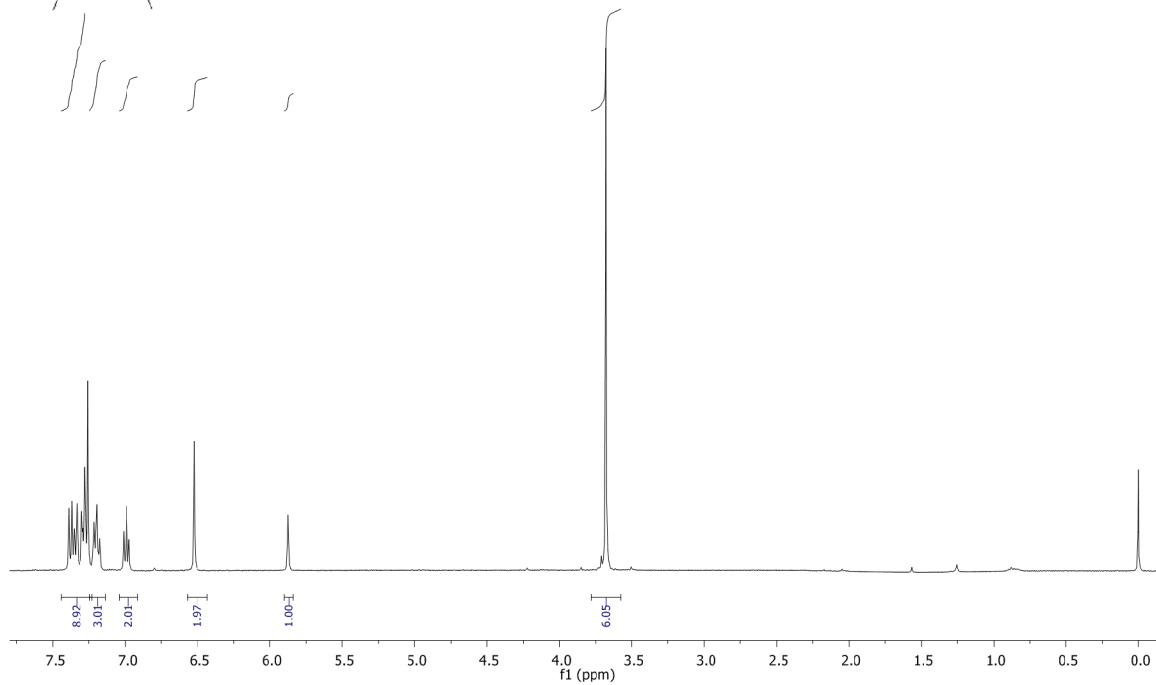

## GC-MS Spectra of Crude Reaction Mixture:

Print Date: 18 Nov 2014 14:39:38

### MS Data Review All Plots - 11/18/2014 2:39 PM

File: c:\varian\sw\data\2014\nov\qu-6 11-18-2014 6-09-13 am.sms

Sample: QU-6

Operator: System

Scan Range: 1 - 2636 Time Range: 0.00 - 38.97 min.

Date: 11/18/2014 6:09 AM

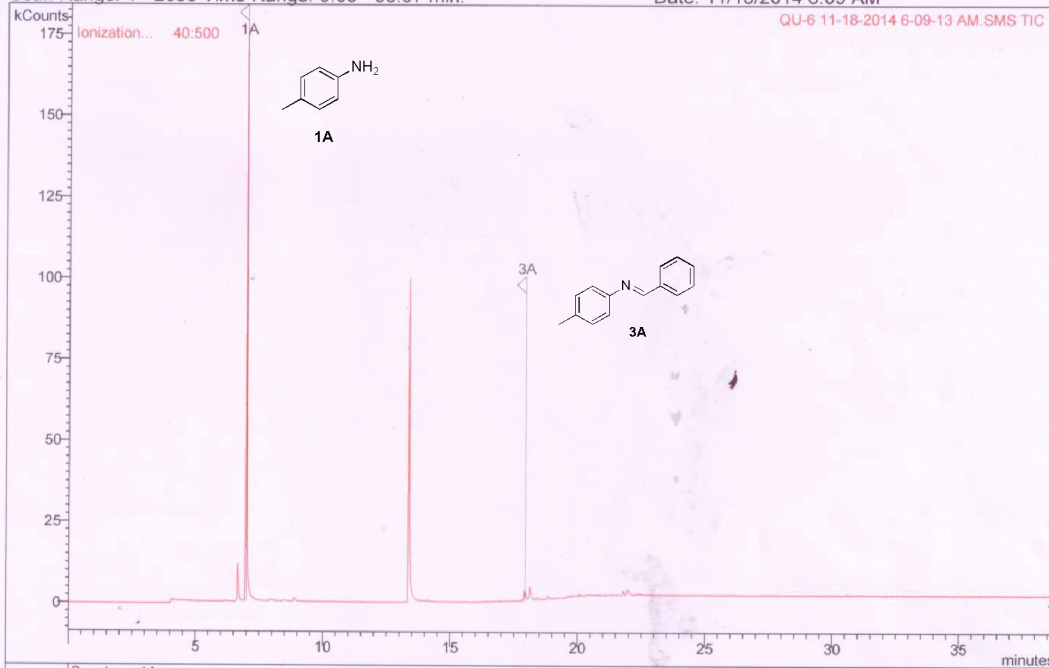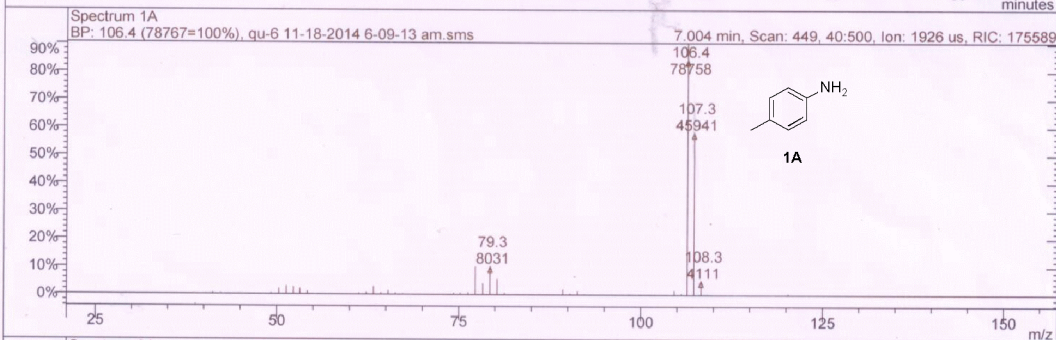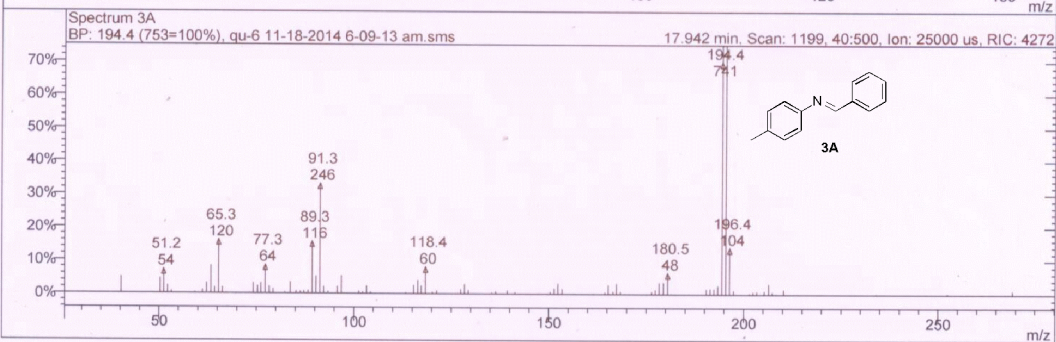



Print Date: 18 Nov 2014 14:44:58

Scan 1199 from c:\varianws\data\2014\nov\qu-6 11-18-2014 6-09-13 am.sms

Entry 23559 from REPLIB NIST Library

R.Match: 855, F.Match: 738

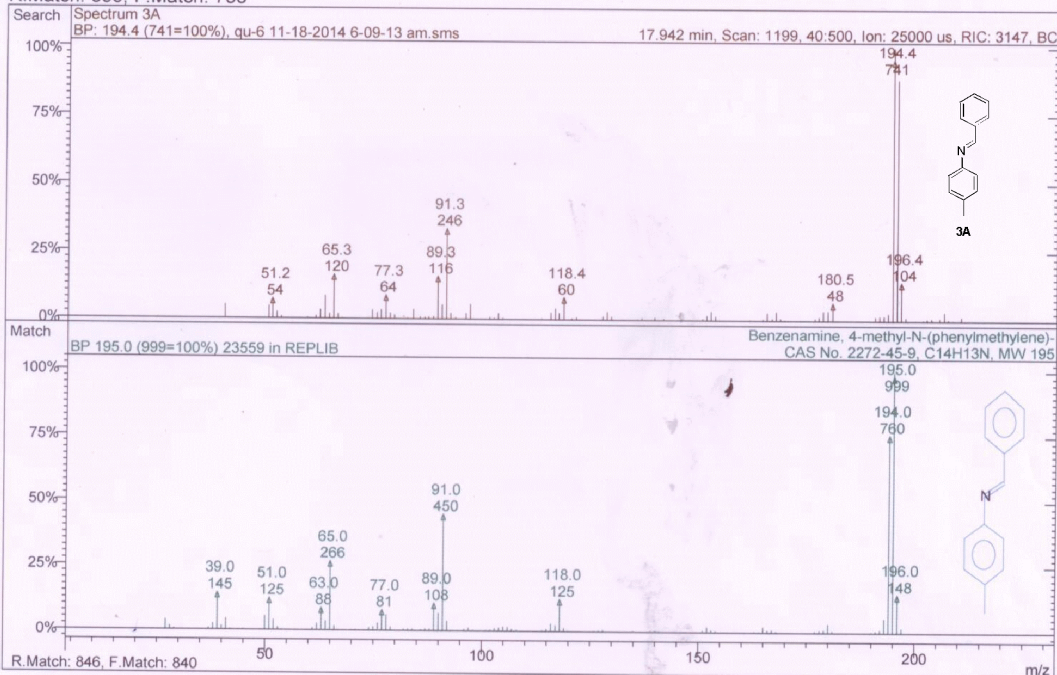

1st Spectrum from ...ws\data\2014\nov\qu-6 11-18-2014 6-09-13 am.sms

Scan No: 1199, Time: 17.942 minutes

No averaging. Background corrected.

Comment: 17.942 min. Scan: 1199 40:500 Ion: 25000 us RIC: 4272

Pair Count: 98 MW: 0 Formula: None

CAS No: None Acquired Range: 39.5 - 500.5 m/z

Method Internal EI and CI, Time: 0.00 - 39.00, Centroid

Seg 1, FIL/MUL DELAY, Time: 0.00- 4.00, Filament Off

Seg 2, <No Description>, Time: 4.00-39.00, Channels: 1

Chan 1, Full EI - Auto

Product Mass Range: 39.5 - 500.5 m/z

| Ion  | Int | Norm | Ion   | Int | Norm | Ion   | Int | Norm |
|------|-----|------|-------|-----|------|-------|-----|------|
| 40.2 | 36  | 49   | 92.3  | 15  | 20   | 165.3 | 20  | 27   |
| 50.3 | 33  | 44   | 93.4  | 4   | 5    | 166.5 | 5   | 7    |
| 51.2 | 54  | 73   | 95.8  | 15  | 20   | 167.4 | 23  | 31   |
| 52.2 | 17  | 23   | 96.8  | 39  | 53   | 168.4 | 5   | 7    |
| 53.2 | 5   | 7    | 101.3 | 5   | 7    | 169.4 | 1   | 1    |
| 59.2 | 2   | 3    | 102.3 | 3   | 4    | 176.4 | 5   | 7    |
| 61.2 | 7   | 9    | 103.3 | 16  | 22   | 177.3 | 9   | 12   |
| 62.2 | 23  | 31   | 104.3 | 3   | 4    | 178.3 | 25  | 34   |
| 63.3 | 61  | 82   | 113.3 | 2   | 3    | 179.4 | 25  | 34   |
| 64.3 | 13  | 18   | 115.4 | 18  | 24   | 180.5 | 48  | 65   |
| 65.3 | 120 | 162  | 116.4 | 29  | 39   | 181.4 | 1   | 1    |
| 66.3 | 13  | 18   | 117.3 | 17  | 23   | 190.4 | 11  | 15   |
| 67.3 | 1   | 1    | 118.4 | 60  | 81   | 191.4 | 12  | 16   |
| 73.3 | 1   | 1    | 120.2 | 3   | 4    | 192.4 | 12  | 16   |
| 74.2 | 23  | 31   | 121.3 | 6   | 8    | 193.4 | 19  | 26   |
| 75.3 | 16  | 22   | 127.4 | 9   | 12   | 194.4 | 741 | 999  |
| 76.2 | 23  | 31   | 128.4 | 21  | 28   | 195.4 | 654 | 882  |
